# Supplementary material for: Microbiota epitope similarity either dampens or enhances the immunogenicity of disease-associated antigenic epitopes
Source: PLoS One. 2018 May 7;13(5):e0196551. doi: 10.1371/journal.pone.0196551 (PMC5937769; doi:10.1371/journal.pone.0196551)
Supplement: S4 Table — (XLSX) [file pone.0196551.s004.xlsx]

## Sheet: Table S4
S4 Table. Sets of negative control epitopes for dominant epitopes
Negative control epitopes	Category	Category abbreviation
LNNIHDLLGIPHIPV	Cockroach	CR
DLLGIPHIPVTARKH	Cockroach	CR
PHIPVTARKHHRRGV	Cockroach	CR
TARKHHRRGVGITGL	Cockroach	CR
HRRGVGITGLIDDII	Cockroach	CR
GITGLIDDIIAILPV	Cockroach	CR
AILPVDDLYALFQEK	Cockroach	CR
DDLYALFQEKLETSP	Cockroach	CR
LETSPEFKALYDAIR	Cockroach	CR
EFKALYDAIRSPEFQ	Cockroach	CR
YDAIRSPEFQSIVGT	Cockroach	CR
SPEFQSIVGTLEAMP	Cockroach	CR
VDHIIELIHQIFNIV	Cockroach	CR
ELIHQIFNIVRDTRG	Cockroach	CR
IFNIVRDTRGLPEDL	Cockroach	CR
RDTRGLPEDLQDFLA	Cockroach	CR
LPEDLQDFLALIPTD	Cockroach	CR
ANDAEVKAAVEYLKS	Cockroach	CR
VKAAVEYLKSDEFET	Cockroach	CR
NFLQTNGLNAIEFLN	Cockroach	CR
NGLNAIEFLNNIHDL	Cockroach	CR
IEFLNNIHDLLGIPH	Cockroach	CR
NIHDLLGIPHIPVTG	Cockroach	CR
LGIPHIPVTGRKHLR	Cockroach	CR
IPVTGRKHLRRGVGI	Cockroach	CR
RKHLRRGVGITGLID	Cockroach	CR
HLRRGVGITGLIDDI	Cockroach	CR
RGVGITGLIDDIIAI	Cockroach	CR
TGLIDDIIAILPVDD	Cockroach	CR
DIIAILPVDDLYALF	Cockroach	CR
LPVDDLYALFQEKLE	Cockroach	CR
LYALFQEKLETSPEF	Cockroach	CR
QEKLETSPEFKALYD	Cockroach	CR
TSPEFKALYDAIRSP	Cockroach	CR
KALYDAIRSPEFQSI	Cockroach	CR
AIRSPEFQSIVETLK	Cockroach	CR
EFQSIVETLKAMPEY	Cockroach	CR
VETLKAMPEYQSLIQ	Cockroach	CR
AMPEYQSLIQKLKDK	Cockroach	CR
QSLIQKLKDKGVDVD	Cockroach	CR
KLKDKGVDVDHIIEL	Cockroach	CR
GVDVDHIIELIHQIF	Cockroach	CR
HIIELIHQIFNIVRD	Cockroach	CR
IHQIFNIVRDTRGLP	Cockroach	CR
NIVRDTRGLPEDLQD	Cockroach	CR
TRGLPEDLQDFLALI	Cockroach	CR
EDLQDFLALIPIDQI	Cockroach	CR
FLALIPIDQILAIAA	Cockroach	CR
LAIAADYLANDAEVQ	Cockroach	CR
AAVEYLKSDEFETIV	Cockroach	CR
FETIVVTVDSLPEFK	Cockroach	CR
LPEFKNFLNFLQTNG	Cockroach	CR
HDLLGIPHIPATGRK	Cockroach	CR
IPHIPATGRKHVRRG	Cockroach	CR
KDKGVDVDHFIELIK	Cockroach	CR
MIGLKLVTVLFAVAT	Cockroach	CR
LVTVLFAVATITHAA	Cockroach	CR
NTQYAGITKIGNQNF	Cockroach	CR
GNQNFLTVFDSTSCN	Cockroach	CR
PNLQKYEKLKPKYIS	Cockroach	CR
DGNVQVKFFDTGSAV	Cockroach	CR
VKFFDTGSAVGRGIE	Cockroach	CR
TGSAVGRGIEDSLTI	Cockroach	CR
VLADELSQEVCILSA	Cockroach	CR
LSQEVCILSADVVVG	Cockroach	CR
CILSADVVVGIAAPG	Cockroach	CR
DVVVGIAAPGCPNAL	Cockroach	CR
IAAPGCPNALKGKTV	Cockroach	CR
KGKTVLENFVEENLI	Cockroach	CR
LENFVEENLIAPVFS	Cockroach	CR
EENLIAPVFSIHHAR	Cockroach	CR
APVFSIHHARFQDGE	Cockroach	CR
FQDGEHFGEIIFGGS	Cockroach	CR
HFGEIIFGGSDWKYV	Cockroach	CR
IFGGSDWKYVDGEFT	Cockroach	CR
DWKYVDGEFTYVPLV	Cockroach	CR
DGEFTYVPLVGDDSW	Cockroach	CR
GDDSWKFRLDGVKIG	Cockroach	CR
KFRLDGVKIGDTTVA	Cockroach	CR
GVKIGDTTVAPAGTQ	Cockroach	CR
DTTVAPAGTQAIIDT	Cockroach	CR
PAGTQAIIDTSKAII	Cockroach	CR
AIIDTSKAIIVGPKA	Cockroach	CR
SKAIIVGPKAYVNPI	Cockroach	CR
VGPKAYVNPINEAIG	Cockroach	CR
YVNPINEAIGCVVEK	Cockroach	CR
NEAIGCVVEKTTTRR	Cockroach	CR
CVVEKTTTRRICKLD	Cockroach	CR
TTTRRICKLDCSKIP	Cockroach	CR
ICKLDCSKIPSLPDV	Cockroach	CR
CSKIPSLPDVTFVIN	Cockroach	CR
SLPDVTFVINGRNFN	Cockroach	CR
TFVINGRNFNISSQY	Cockroach	CR
GRNFNISSQYYIQQN	Cockroach	CR
ISSQYYIQQNGNLCY	Cockroach	CR
YIQQNGNLCYSGFQP	Cockroach	CR
GNLCYSGFQPCGHSD	Cockroach	CR
SGFQPCGHSDHFFIG	Cockroach	CR
CGHSDHFFIGDFFVD	Cockroach	CR
HFFIGDFFVDHYYSE	Cockroach	CR
DFFVDHYYSEFNWEN	Cockroach	CR
HYYSEFNWENKTMGF	Cockroach	CR
FNWENKTMGFGRSVE	Cockroach	CR
WENKTMGFGRSVESV	Cockroach	CR
FRGSWIIAAGTSEAL	Cockroach	CR
SYDDALVSKYTDSQG	Cockroach	CR
TDSQGKNRTTIRGRT	Cockroach	CR
YNDKGKAFSAPYSVL	Cockroach	CR
QEGDWPNLKPSMPFG	Cockroach	CR
MADEQLQLPPEQISV	Cockroach	CR
LQLPPEQISVLRKAF	Cockroach	CR
EQISVLRKAFDAFDR	Cockroach	CR
LRKAFDAFDREKSGS	Cockroach	CR
DAFDREKSGSISTNM	Cockroach	CR
EKSGSISTNMVEEIL	Cockroach	CR
ISTNMVEEILRLMGQ	Cockroach	CR
VEEILRLMGQPFNRR	Cockroach	CR
RLMGQPFNRRTLEEL	Cockroach	CR
PFNRRTLEELIDEVD	Cockroach	CR
TLEELIDEVDADKSG	Cockroach	CR
IDEVDADKSGRLEFD	Cockroach	CR
ADKSGRLEFDEFVTL	Cockroach	CR
RLEFDEFVTLAAKFI	Cockroach	CR
EFVTLAAKFIIEEDS	Cockroach	CR
CLREILRELDEQLTS	Cockroach	CR
LRELDEQLTSDELDM	Cockroach	CR
EQLTSDELDMMIEEI	Cockroach	CR
DADGSGTVDFDEFME	Cockroach	CR
SGTVDFDEFMEMMTG	Cockroach	CR
MDAIKKKMQAMKLEK	Cockroach	CR
KKMQAMKLEKDNAMD	Cockroach	CR
MKLEKDNAMDRALLC	Cockroach	CR
DNAMDRALLCEQQAR	Cockroach	CR
RALLCEQQARDANIR	Cockroach	CR
EQQARDANIRAEKAE	Cockroach	CR
DANIRAEKAEEEARS	Cockroach	CR
AEKAEEEARSLQKKI	Cockroach	CR
EEARSLQKKIQQIEN	Cockroach	CR
LQKKIQQIENDLDQT	Cockroach	CR
QQIENDLDQTMEQLM	Cockroach	CR
DLDQTMEQLMQVNAK	Cockroach	CR
MEQLMQVNAKLDEKD	Cockroach	CR
QVNAKLDEKDKALQN	Cockroach	CR
LDEKDKALQNAESEV	Cockroach	CR
AESEVAALNRRIQLL	Cockroach	CR
AALNRRIQLLEEDLE	Cockroach	CR
RIQLLEEDLERSEER	Cockroach	CR
EEDLERSEERLATAT	Cockroach	CR
ARKILESKGLADEER	Cockroach	CR
ESKGLADEERMDALE	Cockroach	CR
ADEERMDALENQLKE	Cockroach	CR
ARFMAEEADKKYDEV	Cockroach	CR
EEADKKYDEVARKLA	Cockroach	CR
ARKLAMVEADLERAE	Cockroach	CR
MVEADLERAEERAET	Cockroach	CR
ERAETGESKIVELEE	Cockroach	CR
GESKIVELEEELRVV	Cockroach	CR
VELEEELRVVGNNLK	Cockroach	CR
ELRVVGNNLKSLEVS	Cockroach	CR
GNNLKSLEVSEEKAN	Cockroach	CR
SLEVSEEKANLREEE	Cockroach	CR
EEKANLREEEYKQQI	Cockroach	CR
LREEEYKQQIKTLNT	Cockroach	CR
YKQQIKTLNTRLKEA	Cockroach	CR
KTLNTRLKEAEARAE	Cockroach	CR
RLKEAEARAEFAERS	Cockroach	CR
EARAEFAERSVQKLQ	Cockroach	CR
FAERSVQKLQKEVDR	Cockroach	CR
LEDELVHEKEKYKYI	Cockroach	CR
VHEKEKYKYICDDLD	Cockroach	CR
KYKYICDDLDMTFTE	Cockroach	CR
ICDDLDMTFTELIGN	Cockroach	CR
NLLEKLREKGVDVDK	Cockroach	CR
LEKLREKGVDVDKII	Cockroach	CR
EKGVDVDKIIELIRA	Cockroach	CR
VDKIIELIRALFGLT	Cockroach	CR
KIIELIRALFGLTLN	Cockroach	CR
GLTLNAKASRNLQDD	Cockroach	CR
AKASRNLQDDLQDFL	Cockroach	CR
KASRNLQDDLQDFLA	Cockroach	CR
ASRNLQDDLQDFLAL	Cockroach	CR
LQDDLQDFLALIPVD	Cockroach	CR
QDFLALIPVDQIIAI	Cockroach	CR
VQAAVAYLQSDEFET	Cockroach	CR
AYLQSDEFETIVVAL	Cockroach	CR
DEFETIVVALDALPE	Cockroach	CR
IVVALDALPELQNFL	Cockroach	CR
DALPELQNFLNFLEA	Cockroach	CR
LQNFLNFLEANGLNA	Cockroach	CR
NFLEANGLNAIDFLN	Cockroach	CR
NGLNAIDFLNGIHDL	Cockroach	CR
IDFLNGIHDLLGIPH	Cockroach	CR
DLLGIPHIPVSGRKY	Cockroach	CR
PHIPVSGRKYHIRRG	Cockroach	CR
SGRKYHIRRGVGITG	Cockroach	CR
YHIRRGVGITGLIDD	Cockroach	CR
HIRRGVGITGLIDDV	Cockroach	CR
TGLIDDVLAILPIED	Cockroach	CR
DVLAILPIEDLKALF	Cockroach	CR
LPIEDLKALFNEKLE	Cockroach	CR
NEKLETSPDFLALYN	Cockroach	CR
TSPDFLALYNAIRSP	Cockroach	CR
LALYNAIRSPEFQSI	Cockroach	CR
AIRSPEFQSIVQTLN	Cockroach	CR
EFQSIVQTLNAMPEY	Cockroach	CR
VQTLNAMPEYQNLLQ	Cockroach	CR
AMPEYQNLLQKLREK	Cockroach	CR
QNLLQKLREKGVDVD	Cockroach	CR
KLREKGVDVDKIIEL	Cockroach	CR
GVDVDKIIELIRALF	Cockroach	CR
IRALFGLTLNGKASR	Cockroach	CR
GLTLNGKASRNLQDD	Cockroach	CR
LNGKASRNLQDDLQD	Cockroach	CR
GKASRNLQDDLQDFL	Cockroach	CR
SRNLQDDLQDFLALI	Cockroach	CR
NFLNFLEANGLNAID	Cockroach	CR
LEANGLNAIDFLNGI	Cockroach	CR
LNAIDFLNGIHDLLG	Cockroach	CR
VGITGLIDDVLAILP	Cockroach	CR
LIDDVLAILPLDDLK	Cockroach	CR
LAILPLDDLKALFNE	Cockroach	CR
LDDLKALFNEKLETS	Cockroach	CR
ALFNEKLETSPDFLA	Cockroach	CR
KLETSPDFLALYNAI	Cockroach	CR
PDFLALYNAIKSPEF	Cockroach	CR
LYNAIKSPEFQSIVQ	Cockroach	CR
KSPEFQSIVQTLNAM	Cockroach	CR
QSIVQTLNAMPEYQN	Cockroach	CR
TLNAMPEYQNLLEKL	Cockroach	CR
PEYQNLLEKLREKGV	Cockroach	CR
LLEKLREKGVDVDKI	Cockroach	CR
REKGVDVDKIIELIR	Cockroach	CR
DVDKIIELIRALFGL	Cockroach	CR
DKIIELIRALFGLTH	Cockroach	CR
DEIPAEQVVLLKKAF	Cockroach	CR
EQVVLLKKAFDAFDR	Cockroach	CR
LKKAFDAFDREKKGC	Cockroach	CR
DAFDREKKGCISTEM	Cockroach	CR
EKKGCISTEMVGTIL	Cockroach	CR
ISTEMVGTILEMLGT	Cockroach	CR
VGTILEMLGTRLDQD	Cockroach	CR
EMLGTRLDQDMLDEI	Cockroach	CR
RLDQDMLDEIIAEVD	Cockroach	CR
MLDEIIAEVDADGSG	Cockroach	CR
IAEVDADGSGELEFE	Cockroach	CR
ADGSGELEFEEFCTL	Cockroach	CR
ELEFEEFCTLASRFL	Cockroach	CR
EFCTLASRFLVEEDA	Cockroach	CR
ASRFLVEEDAEAMQH	Cockroach	CR
VEEDAEAMQHELREA	Cockroach	CR
EAMQHELREAFRLYD	Cockroach	CR
FRLYDKEGNGYITTA	Cockroach	CR
KEGNGYITTAVLREI	Cockroach	CR
YITTAVLREILKELD	Cockroach	CR
VLREILKELDDKITA	Cockroach	CR
LKELDDKITAEDLDM	Cockroach	CR
DKITAEDLDMMIEEI	Cockroach	CR
EDLDMMIEEIDSDGS	Cockroach	CR
MIEEIDSDGSGTVDF	Cockroach	CR
DSDGSGTVDFDEFME	Cockroach	CR
SGTVDFDEFMEVMTG	Cockroach	CR
GTVDFDEFMEVMTGE	Cockroach	CR
MDELPPEQIQLLKKA	Cockroach	CR
DELPPEQIQLLKKAF	Cockroach	CR
EQIQLLKKAFDAFDR	Cockroach	CR
ISTEMVGTILEMLGH	Cockroach	CR
EMLGHRLDDDMLQEI	Cockroach	CR
RLDDDMLQEIIAEVD	Cockroach	CR
MLQEIIAEVDADGSG	Cockroach	CR
ADGSGELEFEEFVSL	Cockroach	CR
ELEFEEFVSLASRFL	Cockroach	CR
EFVSLASRFLVEEDA	Cockroach	CR
ASRFLVEEDAEAMQQ	Cockroach	CR
VEEDAEAMQQELREA	Cockroach	CR
EAMQQELREAFRLYD	Cockroach	CR
FRLYDKEGNGYITTN	Cockroach	CR
KEGNGYITTNVLREI	Cockroach	CR
YITTNVLREILKELD	Cockroach	CR
DSFQISWSAIWSTGF	Cockroach	CR
TYKTSKLYKMAVAFM	Cockroach	CR
FNMVGFRNAVAGTAV	Cockroach	CR
LRKYLTKEVFDNLKT	Cockroach	CR
DAEAYTVFADLFDPI	Cockroach	CR
VVGVLSQKDPHVWDG	Cockroach	CR
VDVVLNQMSGSWPDA	Cockroach	CR
GFRVDAAKHMWPADL	Cockroach	CR
AAKHMWPADLQYIYS	Cockroach	CR
IGDAFRGNNAIKWLV	Cockroach	CR
IKWLVNFGVGWGYIP	Cockroach	CR
GYPRVMSSFSFDNSD	Cockroach	CR
ISFCRGNKGFVAFND	Cockroach	CR
EFNNDLKQTLQTCLP	Cockroach	CR
YIEILSSADDGVLAI	Cockroach	CR
SSADDGVLAIHVNSK	Cockroach	CR
GVLAIHVNSKVGSKS	Cockroach	CR
AGEYIISTRVRCGRS	Cockroach	CR
GDRFLQHANACRFWP	Cockroach	CR
TGRGIYHNDAKTFLV	Cockroach	CR
DHLRIISMQMGGDLG	Cockroach	CR
GFLTFCPTNLGTTVR	Cockroach	CR
GTTVRASVRIKVPKL	Cockroach	CR
ASVRIKVPKLAADKK	Cockroach	CR
IPADKVFLRKQWDVL	Cockroach	CR
VFLRKQWDVLRLVHR	Cockroach	CR
QWDVLRLVHRIHQHS	Cockroach	CR
RLVHRIHQHSIIPEQ	Cockroach	CR
IHQHSIIPEQVTVGD	Cockroach	CR
IIPEQVTVGDSYDIE	Cockroach	CR
VTVGDSYDIEANINN	Cockroach	CR
SYDIEANINNYKNPR	Cockroach	CR
MALYKKDPVKRGEPF	Cockroach	CR
KDPVKRGEPFSTYYI	Cockroach	CR
AIMLFELFYYANDYD	Cockroach	CR
ELFYYANDYDTFYKT	Cockroach	CR
ANDYDTFYKTACWAR	Cockroach	CR
ACWARDRVNEGMFLY	Cockroach	CR
DRVNEGMFLYSFNIA	Cockroach	CR
GMFLYSFNIAIMHRE	Cockroach	CR
SFNIAIMHREDMQDI	Cockroach	CR
DMQDIVVPAFYEIYP	Cockroach	CR
NDVIQKAYDYKMKES	Cockroach	CR
KMKESGHLNEPHTHV	Cockroach	CR
GHLNEPHTHVIPVNF	Cockroach	CR
PHTHVIPVNFTLRNQ	Cockroach	CR
IPVNFTLRNQEQLLS	Cockroach	CR
TLRNQEQLLSYFTED	Cockroach	CR
EQLLSYFTEDVFLNA	Cockroach	CR
YFTEDVFLNAFNTYF	Cockroach	CR
VFLNAFNTYFRYMYP	Cockroach	CR
FNTYFRYMYPTWFNY	Cockroach	CR
RYMYPTWFNYTKYEY	Cockroach	CR
TWFNYTKYEYDVPRH	Cockroach	CR
TKYEYDVPRHGEQFY	Cockroach	CR
DVPRHGEQFYYFNQQ	Cockroach	CR
GEQFYYFNQQMFARY	Cockroach	CR
MFARYMLERYSNDMP	Cockroach	CR
SNDMPEIQPFTYTKP	Cockroach	CR
TYTKPFKTPYNPQLR	Cockroach	CR
FKTPYNPQLRYPNGQ	Cockroach	CR
NPQLRYPNGQEVPAR	Cockroach	CR
YPNGQEVPARPAYMM	Cockroach	CR
EVPARPAYMMPQDFD	Cockroach	CR
PAYMMPQDFDLMYVS	Cockroach	CR
PQDFDLMYVSDIKNY	Cockroach	CR
LMYVSDIKNYEKRVA	Cockroach	CR
DIKNYEKRVADAVDF	Cockroach	CR
EKRVADAVDFGYVFC	Cockroach	CR
DAVDFGYVFCDKMIS	Cockroach	CR
GYVFCDKMISHSLYN	Cockroach	CR
DKMISHSLYNNEKGL	Cockroach	CR
HSLYNNEKGLEWLGQ	Cockroach	CR
NEKGLEWLGQIVEGN	Cockroach	CR
EWLGQIVEGNSMHPD	Cockroach	CR
IVEGNSMHPDFYGHI	Cockroach	CR
SMHPDFYGHIFHMYR	Cockroach	CR
FHMYRSLLGHITDPF	Cockroach	CR
SLLGHITDPFHKHGV	Cockroach	CR
ITDPFHKHGVAPSAL	Cockroach	CR
HKHGVAPSALEHPET	Cockroach	CR
APSALEHPETSLRDP	Cockroach	CR
AFYQIWKRVQHYFNK	Cockroach	CR
HYFNKFQMKQPYYTR	Cockroach	CR
FQMKQPYYTREELAF	Cockroach	CR
PYYTREELAFDGVKI	Cockroach	CR
DGVKIDNVDVGKLYT	Cockroach	CR
GKLYTYFEPYEMGLS	Cockroach	CR
EMGLSNAVKVGKLED	Cockroach	CR
NAVKVGKLEDVPNVD	Cockroach	CR
GKLEDVPNVDIRARN	Cockroach	CR
VPNVDIRARNYRLNH	Cockroach	CR
IRARNYRLNHKPFTY	Cockroach	CR
NVEVTSEKDTPVYVR	Cockroach	CR
SEKDTPVYVRVFLGP	Cockroach	CR
VFLGPKYNYYGHEYD	Cockroach	CR
KYNYYGHEYDLNERR	Cockroach	CR
GHEYDLNERRNYFVE	Cockroach	CR
LNERRNYFVEIDRFP	Cockroach	CR
YQLHTGKNTIQRNSH	Cockroach	CR
GKNTIQRNSHDSSVV	Cockroach	CR
QRNSHDSSVVAQEQD	Cockroach	CR
DSSVVAQEQDTYKVL	Cockroach	CR
AQEQDTYKVLYKKVN	Cockroach	CR
TYKVLYKKVNEAYEG	Cockroach	CR
YKKVNEAYEGKTTYT	Cockroach	CR
KTTYTYEKQDKYCGL	Cockroach	CR
YEKQDKYCGLPEHLL	Cockroach	CR
KYCGLPEHLLIPKGK	Cockroach	CR
IPKGKKGGQAFTVYV	Cockroach	CR
KGGQAFTVYVIVTPY	Cockroach	CR
FTVYVIVTPYDKAVE	Cockroach	CR
IVTPYDKAVEKEEHH	Cockroach	CR
DKAVEKEEHHFKAYS	Cockroach	CR
KEEHHFKAYSYCGVG	Cockroach	CR
FKAYSYCGVGPHDSV	Cockroach	CR
YCGVGPHDSVYDKKP	Cockroach	CR
PHDSVYDKKPLGFPF	Cockroach	CR
YDKKPLGFPFDRPIH	Cockroach	CR
LGFPFDRPIHSYDFV	Cockroach	CR
DRPIHSYDFVTPNMF	Cockroach	CR
SYDFVTPNMFMKDVF	Cockroach	CR
TPNMFMKDVFIFHKK	Cockroach	CR
MKDVFIFHKKYEEVE	Cockroach	CR
DVFIFHKKYEEVEQH	Cockroach	CR
MADKEKKKKKKAKEE	Cockroach	CR
KKKKKKAKEEAPAAE	Cockroach	CR
KAKEEAPAAEAAPAP	Cockroach	CR
APAAEAAPAPAPAAA	Cockroach	CR
AAPAPAPAAAEPARQ	Cockroach	CR
APAAAEPARQSSRGS	Cockroach	CR
EPARQSSRGSRKAQR	Cockroach	CR
SSRGSRKAQRKGSNV	Cockroach	CR
RKAQRKGSNVFSMFS	Cockroach	CR
QKQVAEFKEAFQLMD	Cockroach	CR
EFKEAFQLMDADKDG	Cockroach	CR
FQLMDADKDGIISKN	Cockroach	CR
ADKDGIISKNDLRAT	Cockroach	CR
IISKNDLRATFDQLG	Cockroach	CR
DLRATFDQLGRLAVD	Cockroach	CR
FDQLGRLAVDKELDE	Cockroach	CR
RLAVDKELDEMVNEA	Cockroach	CR
KELDEMVNEAPGPIN	Cockroach	CR
MVNEAPGPINFTQLL	Cockroach	CR
FTQLLTLFAGRMSGG	Cockroach	CR
RMSGGSDDDEVVIAA	Cockroach	CR
SDDDEVVIAAFKTFE	Cockroach	CR
VVIAAFKTFEDDGKI	Cockroach	CR
FKTFEDDGKIDSERL	Cockroach	CR
DDGKIDSERLRHALM	Cockroach	CR
DSERLRHALMTWGDK	Cockroach	CR
RHALMTWGDKFSADE	Cockroach	CR
TWGDKFSADEVDDAY	Cockroach	CR
FSADEVDDAYDNFEI	Cockroach	CR
VDDAYDNFEIDDKGF	Cockroach	CR
DNFEIDDKGFINTAK	Cockroach	CR
DDKGFINTAKLIQLL	Cockroach	CR
INTAKLIQLLTASPE	Cockroach	CR
LIQLLTASPEEEEGG	Cockroach	CR
TASPEEEEGGEGEAA	Cockroach	CR
TKEVFDNLKTKKTPT	Cockroach	CR
LDVIQSGLENHDSGV	Cockroach	CR
SGLENHDSGVGIYAP	Cockroach	CR
HDSGVGIYAPDAEAY	Cockroach	CR
GIYAPDAEAYTVFAD	Cockroach	CR
TVFADLFDPIIEDYH	Cockroach	CR
LFDPIIEDYHGGFKK	Cockroach	CR
TDKHPPKDWGDVDTL	Cockroach	CR
PKDWGDVDTLGNLDP	Cockroach	CR
MQGYPFNPCLTEAQY	Cockroach	CR
FNPCLTEAQYKEMED	Cockroach	CR
TEAQYKEMEDKVSST	Cockroach	CR
KEMEDKVSSTLSGLE	Cockroach	CR
KVSSTLSGLEGELKG	Cockroach	CR
LSGLEGELKGQFYPL	Cockroach	CR
GELKGQFYPLTGMTK	Cockroach	CR
QFYPLTGMTKEVQQK	Cockroach	CR
TGMTKEVQQKLIDDH	Cockroach	CR
CRFWPTGRGIYHNDA	Cockroach	CR
KLEEVAGKYNLQVRG	Cockroach	CR
AGKYNLQVRGTRGEH	Cockroach	CR
LQVRGTRGEHTEAEG	Cockroach	CR
TRGEHTEAEGGVYDI	Cockroach	CR
MGLTEYDAVKGMNDG	Cockroach	CR
GMNDGIAELIKIESS	Cockroach	CR
MNDGIAELIKIESSL	Cockroach	CR
SQKDPHVWDGRSAIV	Cockroach	CR
HLFEWKFADIADECE	Cockroach	CR
KFADIADECERFLGP	Cockroach	CR
ADECERFLGPKGFAG	Cockroach	CR
RFLGPKGFAGVQVSP	Cockroach	CR
VQVSPVHENVIISSP	Cockroach	CR
IISSPFRPWWERYQL	Cockroach	CR
VSYKLVSRSGDENAF	Cockroach	CR
VSRSGDENAFRDMVR	Cockroach	CR
DENAFRDMVRRCNNV	Cockroach	CR
NQMSGSWPDAHGQGG	Cockroach	CR
SWPDAHGQGGSTADT	Cockroach	CR
HGQGGSTADTYNLQY	Cockroach	CR
STADTYNLQYPAVPY	Cockroach	CR
YNLQYPAVPYGPGDF	Cockroach	CR
PAVPYGPGDFHSTCT	Cockroach	CR
GPGDFHSTCTVSNYQ	Cockroach	CR
HSTCTVSNYQDPSNV	Cockroach	CR
VSNYQDPSNVRNCEL	Cockroach	CR
DPSNVRNCELVGLHD	Cockroach	CR
RNCELVGLHDLNQGS	Cockroach	CR
VGLHDLNQGSDYVRG	Cockroach	CR
LNHLVDCGVAGFRVD	Cockroach	CR
KVNNLNTDHGFPSGA	Cockroach	CR
NTDHGFPSGARPFFY	Cockroach	CR
FPSGARPFFYQEVID	Cockroach	CR
QEVIDLGGEAIHSTE	Cockroach	CR
LGGEAIHSTEYTGFG	Cockroach	CR
IHSTEYTGFGRVTEF	Cockroach	CR
YTGFGRVTEFKYSRD	Cockroach	CR
RVTEFKYSRDIGDAF	Cockroach	CR
KYSRDIGDAFRGNNA	Cockroach	CR
NFGVGWGYIPDGDAL	Cockroach	CR
WGYIPDGDALVFVDN	Cockroach	CR
DGDALVFVDNHDNQR	Cockroach	CR
VFVDNHDNQRGHGAG	Cockroach	CR
HDNQRGHGAGGASIL	Cockroach	CR
GHGAGGASILTYKTS	Cockroach	CR
LAYPYGYPRVMSSFS	Cockroach	CR
MSSFSFDNSDQGPPQ	Cockroach	CR
FDNSDQGPPQDGNGN	Cockroach	CR
QGPPQDGNGNIISPS	Cockroach	CR
IISPSINADGTCGNG	Cockroach	CR
TCGNGWVCEHRWRQI	Cockroach	CR
FRNAVAGTAVSNWWD	Cockroach	CR
SNWWDNGDKQISFCR	Cockroach	CR
VAFNDEFNNDLKQTL	Cockroach	CR
LKQTLQTCLPAGDYC	Cockroach	CR
QTCLPAGDYCDVISG	Cockroach	CR
AGDYCDVISGSYENG	Cockroach	CR
DVISGSYENGSCTGK	Cockroach	CR
SYENGSCTGKTVTVG	Cockroach	CR
SCTGKTVTVGSDGKA	Cockroach	CR
TVTVGSDGKAYIEIL	Cockroach	CR
SDGKAYIEILSSADD	Cockroach	CR
HVNSKVGSKSQTTTT	Cockroach	CR
VGSKSQTTTTQSSHC	Cockroach	CR
NLKNFTFYSGETIHK	Cockroach	CR
GDLSYSTSLVKAHSM	Cockroach	CR
PKEASHLITVLPAAV	Cockroach	CR
AYLHFLFEMTKDPVF	Cockroach	CR
VLAFSEVIHQVEMHQ	Cockroach	CR
NSIKIQLYTHALGVT	Cockroach	CR
LHYLRPYIIQLKTIT	Cockroach	CR
PYIIQLKTITHHQRL	Cockroach	CR
LLMKADPSIHVLKMV	Cockroach	CR
VPDFETVYMDQLFKL	Cockroach	CR
TVYMDQLFKLIHVRK	Cockroach	CR
QLFKLIHVRKTAHFE	Cockroach	CR
WFLDEFKVLQLFTGL	Cockroach	CR
FKVLQLFTGLNYDVP	Cockroach	CR
TKDIFYNNLTVYYDH	Cockroach	CR
QSKFYETLNPVVQQN	Cockroach	CR
PRRQEYLSKSMALTG	Cockroach	CR
DATAVVLDMTLKFEG	Cockroach	CR
PAESYFTTTVSHATS	Cockroach	CR
SHATSLVNGSSNYLL	Cockroach	CR
LVNGSSNYLLFYDQH	Cockroach	CR
SNYLLFYDQHYYEEK	Cockroach	CR
YKVYDFVRTHLYPHV	Cockroach	CR
DAFYTILDIPQKFNM	Cockroach	CR
QKFNMEYFKVAFKPT	Cockroach	CR
NALLCCLLVSAASAI	Cockroach	CR
SRIMIQASNMYRNFT	Cockroach	CR
LTPWGCYAKDMALFV	Cockroach	CR
CYAKDMALFVASYAD	Cockroach	CR
YIMIMKTPKTIAVSF	Cockroach	CR
RLFHTQPSITYQTLK	Cockroach	CR
QSTWINYFKLIHVRK	Cockroach	CR
QASNMYRNFTKGLLW	Cockroach	CR
KYPYVVKNFVAAYKN	Cockroach	CR
YVRVFLGPKYDYLHS	Cockroach	CR
LLLLLAAVSASQQCK	Cockroach	CR
SEASLNLKRAILAHF	Cockroach	CR
ILAHFQVAPQETARS	Cockroach	CR
HLRQDFASVTYHVES	Cockroach	CR
AGTKMFLDALFRAGT	Cockroach	CR
AEFYYLQLAYTRHVT	Cockroach	CR
LQLAYTRHVTKAALL	Cockroach	CR
TRHVTKAALLAAVTL	Cockroach	CR
KAALLAAVTLLEQPN	Cockroach	CR
AEVDEFLEKLSLLLN	Cockroach	CR
FLEKLSLLLNGGCKV	Cockroach	CR
IVSYLRNLRASANPS	Cockroach	CR
GYFNTHTAAEVVQKG	Cockroach	CR
DRELLLELSTRLFGA	Cockroach	CR
LKLVLAGSSAVHVEL	Cockroach	CR
RFVPSAAVEFVGAFV	Cockroach	CR
AAVEFVGAFVVDAYA	Cockroach	CR
VGAFVVDAYAVEAGL	Cockroach	CR
VDAYAVEAGLKVAAT	Cockroach	CR
VEAGLKVAATLHTAT	Cockroach	CR
PVQKQDIVTLKTEVL	Cockroach	CR
DIVTLKTEVLTTVQE	Cockroach	CR
FPWDPVASKAAFYPL	Cockroach	CR
TDLKVYYGENHVVLK	Cockroach	CR
ATVELYYNAEKKLAF	Cockroach	CR
SSGKASYESFQNFRV	Cockroach	CR
SYESFQNFRVEADIE	Cockroach	CR
LKKWHVLLANKPQAK	Cockroach	CR
KALGVILTLPQRIIA	Cockroach	CR
DGASYISTLAYQDEK	Cockroach	CR
EQYIYVKSPTAELIK	Cockroach	CR
YKKILPTRSSPLISC	Cockroach	CR
GLEYVKQLLENGAQH	Cockroach	CR
DEKWELQIAINVNGV	Cockroach	CR
GGKGGVIVNIASILG	Cockroach	CR
IESIRKQTAIEIEQL	Cockroach	CR
KLQIQITELEMSLDV	Cockroach	CR
EQERIVKIEAIKKSL	Cockroach	CR
LSLIRAKHRTFVTTS	Cockroach	CR
FDGILGMAYSTISVD	Cockroach	CR
AGNKLAMQEFMILPT	Cockroach	CR
AMQEFMILPTGAATF	Cockroach	CR
MGSEVYHHLKNVIKG	Cockroach	CR
KDQLTALYMEFIKEF	Cockroach	CR
ALYMEFIKEFPVVSI	Cockroach	CR
QDHWDAWTAMTAATP	Cockroach	CR
AWTAMTAATPIQIVG	Cockroach	CR
NCLLLKVNQIGTVTE	Cockroach	CR
RLAKYNQILRIEEEL	Cockroach	CR
AGEKVRIIIDRFMDF	Cockroach	CR
RIIIDRFMDFREQEK	Cockroach	CR
VPPELVVVFDVRLAV	Cockroach	CR
VVVFDVRLAVTVDHA	Cockroach	CR
HDEFLNEDIFLKGID	Cockroach	CR
NEDIFLKGIDIFCQI	Cockroach	CR
LKGIDIFCQIIPAVA	Cockroach	CR
IFCQIIPAVANVAPP	Cockroach	CR
TLGEAISSSTLRVFA	Cockroach	CR
NIREGGFAHFEARLE	Cockroach	CR
SSRITTFFNFGYVAL	Cockroach	CR
TFFNFGYVALTIKHV	Cockroach	CR
GYVALTIKHVTTHDI	Cockroach	CR
GVLVFTKENFKKGVS	Cockroach	CR
DNEFVLVEFYAPWCG	Cockroach	CR
PTLKFFRSGSPIDYS	Cockroach	CR
DEIVSWLLKKTGPVA	Cockroach	CR
VDDAKSFIDASNVAI	Cockroach	CR
PQIEVTFEIDANGIL	Cockroach	CR
LESYAYSLKNQLADK	Cockroach	CR
KKELEDIVQPIIAKL	Cockroach	CR
DIVQPIIAKLYQGAG	Cockroach	CR
LELGALLTAMAMVTA	Cockroach	CR
LLTAMAMVTAKLATV	Cockroach	CR
STDSTLVYKIQPVNN	Cockroach	CR
LVYKIQPVNNAHGGG	Cockroach	CR
ASYFKSNCPDAYSYA	Cockroach	CR
SSLEVFFQQQRILLR	Cockroach	CR
FFQQQRILLRLHRCF	Cockroach	CR
WGGDVAFVKHLTALE	Cockroach	CR
NQLNEIRHAILAAGD	Cockroach	CR
KDLLFKNSATGLLSV	Cockroach	CR
KHCLQMASNTMPYQI	Cockroach	CR
MPYQIASGFSTSQLA	Cockroach	CR
ASGFSTSQLAMIQNA	Cockroach	CR
ERDDYVTIHWENIQS	Cockroach	CR
YGKIIKRLEAKGFKL	Cockroach	CR
KGFKLVAMKFVWADE	Cockroach	CR
VAMKFVWADEELLKK	Cockroach	CR
FPGLVKYMSSGPVVP	Cockroach	CR
MVWEGLNVVKTGRLM	Cockroach	CR
LNVVKTGRLMLGATD	Cockroach	CR
STRMELQHLQSIEVF	Cockroach	CR
LQHLQSIEVFPEDEG	Cockroach	CR
YTNEANIYKLNIAEI	Cockroach	CR
NIYKLNIAEIFPEDS	Cockroach	CR
MFRLVVIATLLVASC	Cockroach	CR
VIATLLVASCLGAAT	Cockroach	CR
DYDGITANMICAAVP	Cockroach	CR
DTKLRIMKTHQFTNC	Cockroach	CR
KINYDSLYNLNYIGS	Cockroach	CR
SVRLQSWQSEMLRMN	Cockroach	CR
AKRFAKWALPLYYKP	Cockroach	CR
KKGVDALANAVKVTL	Cockroach	CR
KIAAMKDLLPILEPV	Cockroach	CR
GEALATLVVNKIRGT	Cockroach	CR
TLVVNKIRGTLKVAA	Cockroach	CR
KAMLEDIAILTGGSV	Cockroach	CR
VAVLYVGAASEVEMK	Cockroach	CR
IVAGGGVALVRAINS	Cockroach	CR
PTKVARVALENAASV	Cockroach	CR
MPLQKLFARRIFDSR	Cockroach	CR
TDLGLFRAAVPSGAS	Cockroach	CR
IDNVNKIIVPELLKQ	Cockroach	CR
LGANAILGVSIAVCK	Cockroach	CR
GVPDVILPVPAFNVI	Cockroach	CR
VSCVRFSPNHSNPII	Cockroach	CR
KNILPSNVAAAAQNC	Cockroach	CR
LFARRIFDSRGNPTI	Cockroach	CR
EVDLTTDLGLFRAAV	Cockroach	CR
ELLKQSFEATQQKEI	Cockroach	CR
KGVPLYRHIADLAGV	Cockroach	CR
YRHIADLAGVPDVIL	Cockroach	CR
PDVILPVPAFNVING	Cockroach	CR
QEFMILPTGAATFTE	Cockroach	CR
SEVYHHLKNVIQGKF	Cockroach	CR
WIDKDQLTALYMEFI	Cockroach	CR
QLTALYMEFIKEFPV	Cockroach	CR
YMEFIKEFPVVSIED	Cockroach	CR
HWDAWTAMTAATPIQ	Cockroach	CR
TAMTAATPIQIVGDD	Cockroach	CR
IVGDDLTVTNPTRIQ	Cockroach	CR
LTVTNPTRIQTAIDK	Cockroach	CR
KACNCLLLKVNQIGT	Cockroach	CR
FIADLVVGLSTGQIK	Cockroach	CR
RSERLAKYNQILRIE	Cockroach	CR
MAKDIKFDIEARDKL	Cockroach	CR
NVVLQKSFGGPQVTK	Cockroach	CR
LEDPIENLGAQMVKE	Cockroach	CR
DGTTTATVLAQAIVR	Cockroach	CR
RALEAVIIDLRKQSR	Cockroach	CR
VIIDLRKQSREVGGN	Cockroach	CR
TEKIKQVASISANND	Cockroach	CR
EGMQFDRGYQSPYFV	Cockroach	CR
DQPQILLSDKKIAAM	Cockroach	CR
LLSDKKIAAMKDLLP	Cockroach	CR
KDLLPILEPVAQSGK	Cockroach	CR
ILEPVAQSGKPLLII	Cockroach	CR
KIRGTLKVAAIKAPG	Cockroach	CR
GSKLEDVKLNMLGKA	Cockroach	CR
DVKLNMLGKAERVII	Cockroach	CR
QERLAKLAGGVAVLY	Cockroach	CR
VDDALNATRAAVEEG	Cockroach	CR
RAINSLDNLRGENAD	Cockroach	CR
VTEIKKDENNAVPSM	Cockroach	CR
ALLCCLLVSAASAIT	Cockroach	CR
TPGWLPINSQLDYHV	Cockroach	CR
PINSQLDYHVHGRTF	Cockroach	CR
LDYHVHGRTFSSLFQ	Cockroach	CR
EKLHWDVVPMSQQPF	Cockroach	CR
DVVPMSQQPFQIELN	Cockroach	CR
SQQPFQIELNSRGEV	Cockroach	CR
SRGEVRKLRVNKFVE	Cockroach	CR
ISQLQVVVDEDKKVY	Cockroach	CR
TFYSGETIHKIVLNP	Cockroach	CR
KGRELTVIDYELRNV	Cockroach	CR
TVIDYELRNVGDLSY	Cockroach	CR
SHNQKLSKKRQVPLP	Cockroach	CR
LSKKRQVPLPRPLFE	Cockroach	CR
IPANLLPTYNLIHNT	Cockroach	CR
LPTYNLIHNTKQVDV	Cockroach	CR
YKLENDHPNYMNWDT	Cockroach	CR
LFEMTKDPVFKNMTY	Cockroach	CR
QEFDDAVKENNSIKI	Cockroach	CR
AVKENNSIKIQLYTH	Cockroach	CR
LLSLYLDQNEHADIR	Cockroach	CR
VLKMVAELTHTESNN	Cockroach	CR
YSEMRRKAKAVEHLL	Cockroach	CR
STRNMDVSYSKSYLY	Cockroach	CR
DVSYSKSYLYGYKSK	Cockroach	CR
KSYLYGYKSKKINYD	Cockroach	CR
GYKSKKINYDSLYNL	Cockroach	CR
EDSIYPKSMLLNIFT	Cockroach	CR
DLWEAFHTIYKKDNG	Cockroach	CR
FWAFDNTTFSNASAV	Cockroach	CR
IQEFLKTYKKPTNFN	Cockroach	CR
PTNFNHTKLSSSSSI	Cockroach	CR
SSSSITLTLPCAMGL	Cockroach	CR
GEFSIQTDAKTDVPM	Cockroach	CR
TDVPMSLENFMNITG	Cockroach	CR
SLENFMNITGSINLM	Cockroach	CR
RKVEVHVPVKFQINL	Cockroach	CR
DFKNHNGFIRIIPLF	Cockroach	CR
QTIPYTTIHNVPDFE	Cockroach	CR
IHVRKTAHFEKKMGE	Cockroach	CR
NTGIVFKVKYDTDQE	Cockroach	CR
FKVKYDTDQEFLDTK	Cockroach	CR
ETLNPVVQQNLKLSS	Cockroach	CR
VVQQNLKLSSGKKQK	Cockroach	CR
YLSKSMALTGDATAV	Cockroach	CR
FTTTVSHATSLVNGS	Cockroach	CR
KRNQFCLSWSVYKPQ	Cockroach	CR
CLSWSVYKPQVPIMN	Cockroach	CR
VYKPQVPIMNIYSAF	Cockroach	CR
ANIDMLRLSEHLDYV	Cockroach	CR
ASDLNRVHVDINYNL	Cockroach	CR
SEDVIVDNPAQFISA	Cockroach	CR
VDNPAQFISANFTLK	Cockroach	CR
NFTLKDNTRAFNVSI	Cockroach	CR
DNTRAFNVSIKTPVL	Cockroach	CR
FNVSIKTPVLSVNAT	Cockroach	CR
MLRMNPRTSFAKRFA	Cockroach	CR
TYSAHHIVQNDAFYT	Cockroach	CR
DLNVSQDRIGYVYAF	Cockroach	CR
LILATAALAVAYPSP	Cockroach	CR
LADKTYLTRQRDLLK	Cockroach	CR
YLTRQRDLLKLLVRI	Cockroach	CR
LLVRIQQPNYYADQY	Cockroach	CR
YADQYEIGQSYDIEA	Cockroach	CR
YDIEANINNYKYPYV	Cockroach	CR
NINNYKYPYVVKNFV	Cockroach	CR
PYYTTQSYETKLLFD	Cockroach	CR
LFYYANDYDTFYKTA	Cockroach	CR
LFVDSDVIQRAYETR	Cockroach	CR
DVIQRAYETRMSDVH	Cockroach	CR
MSDVHLTAPKTYIFP	Cockroach	CR
TYIFPVNYTVHTPEQ	Cockroach	CR
YHDVGLNTYYSYYYF	Cockroach	CR
NYPTFFNSTEYGVQF	Cockroach	CR
EPLHYDRPFQTEYNP	Cockroach	CR
DRPFQTEYNPQLRYP	Cockroach	CR
PVRPYEYSRRSLYYS	Cockroach	CR
EYSRRSLYYSNGYSH	Cockroach	CR
SLYYSNGYSHYYGNY	Cockroach	CR
NYYTGDYHPSYYYGY	Cockroach	CR
ATQYDYYYPEDLQSY	Cockroach	CR
YYYPEDLQSYERRVR	Cockroach	CR
FQGEKYPLYENYIKG	Cockroach	CR
YPLYENYIKGIDYLG	Cockroach	CR
YYRQLAGKSVDPYNN	Cockroach	CR
DPYNNYGLAPSALQN	Cockroach	CR
YGLAPSALQNIYTTL	Cockroach	CR
SALQNIYTTLRDPAN	Cockroach	CR
RDPANWQILKRVNYL	Cockroach	CR
EHFDVDLDNVVNVKV	Cockroach	CR
AEDGKYIDYRARQTR	Cockroach	CR
YIDYRARQTRLNHKP	Cockroach	CR
FVEIDRFPYKVQAGK	Cockroach	CR
RFPYKVQAGKTTITR	Cockroach	CR
SVVSPDYQSYRTLMR	Cockroach	CR
RTLMRKVYDAYEGKD	Cockroach	CR
YEGKDQFYYDKSEQY	Cockroach	CR
QFYYDKSEQYCGYPE	Cockroach	CR
YKSFSYCGVGANHRI	Cockroach	CR
SHDFVTPNMYFKDVV	Cockroach	CR
NKAFKTPYNPQLRYP	Cockroach	CR
FSNMDIKGKNALVTG	Cockroach	CR
KQLLENGAQHVAVCD	Cockroach	CR
LQIAINVNGVVRGTL	Cockroach	CR
ASILGLQNMAGCPVY	Cockroach	CR
GCPVYVGTKHAVVGI	Cockroach	CR
AVVGISRSFGMPFHF	Cockroach	CR
MPFHFDRTGVRVLTM	Cockroach	CR
GNKPVYEVAIPDRLT	Cockroach	CR
AGVLWVCATGMARQV	Cockroach	CR
AGNTYVYSFEGGTTT	Cockroach	CR
QGDGVKLHLKAKAEV	Cockroach	CR
RGGTTTITKSRNLNK	Cockroach	CR
CHLREHLRQDFASVT	Cockroach	CR
FASVTYHVESDLQNS	Cockroach	CR
TQEFKHQLQGGVLRV	Cockroach	CR
KYLYRPFANQDAGAK	Cockroach	CR
VVRVVRHTSKNDLLS	Cockroach	CR
NDLLSVYNQVKSGAG	Cockroach	CR
FKDKSAGTKMFLDAL	Cockroach	CR
VAVELLKSNKITGPH	Cockroach	CR
SNYDEEVKIVATLKA	Cockroach	CR
ATLKALQNAHHLNDA	Cockroach	CR
HLNDAVTSKLQTCLL	Cockroach	CR
DDGVPTRIRSAVLDV	Cockroach	CR
CKAKDISLEVLKNYQ	Cockroach	CR
KELLDKEPSYQVGSF	Cockroach	CR
RNLRASANPSKEKQK	Cockroach	CR
IRTTKRFPIDFRKFS	Cockroach	CR
RFPIDFRKFSNNFEF	Cockroach	CR
TTVESNVIYSQNSFL	Cockroach	CR
LNLTTEFFGHSVNLL	Cockroach	CR
DVENTAKQRFNHAIR	Cockroach	CR
AKQRFNHAIRGKRSV	Cockroach	CR
TKEQLELVKSKSVSP	Cockroach	CR
ELVKSKSVSPYHSET	Cockroach	CR
EVGWLALHHNARDAA	Cockroach	CR
TTFNLLDKVMKKAKD	Cockroach	CR
FLDTELVYPTSLGFP	Cockroach	CR
SLGFPLKLVLAGSSA	Cockroach	CR
VHDLVHNLKNSHVHF	Cockroach	CR
HNLKNSHVHFRFVPS	Cockroach	CR
KVAATLHTATGSDIT	Cockroach	CR
DVGVDVTVGLPVQKQ	Cockroach	CR
HGCFDQLSPLVGLTF	Cockroach	CR
VGLTFCTTMSFPWDP	Cockroach	CR
AFYPLNGPSKFSLVV	Cockroach	CR
TSYHFRASLNKADPH	Cockroach	CR
KKSLELLLETPGSKT	Cockroach	CR
ERKLGLILERTYDPY	Cockroach	CR
TYDPYHGVKAQLNSP	Cockroach	CR
HGVKAQLNSPWKQVS	Cockroach	CR
QLNSPWKQVSAELAF	Cockroach	CR
DEQEYYVKLGASVTG	Cockroach	CR
YYGENHVVLKSGFKR	Cockroach	CR
HVVLKSGFKRPSANN	Cockroach	CR
GVNLIWNHKRDKNNF	Cockroach	CR
DKNNFGNSLAVVHGR	Cockroach	CR
EARFTLNQEAHYQFD	Cockroach	CR
EFASKNKVTYPLLGI	Cockroach	CR
PLLGIIGKLDASVQP	Cockroach	CR
KTFHLDVEASYEKHK	Cockroach	CR
RVIVSEGKSKFTTEL	Cockroach	CR
QPDPYKLDSGLVYNP	Cockroach	CR
NYLVGNAQFKYTNGE	Cockroach	CR
GSATLNVDVPKLGRK	Cockroach	CR
GSQHVATVELYYNAE	Cockroach	CR
YYNAEKKLAFHTDTD	Cockroach	CR
KKLAFHTDTDLKKDS	Cockroach	CR
PQKFKVVFDTGSSNL	Cockroach	CR
FYNMVKQGLVSQPIF	Cockroach	CR
YKGDFTYLSVDRKMY	Cockroach	CR
TYLSVDRKMYWQFKM	Cockroach	CR
WQFKMDKIQIGNGSF	Cockroach	CR
ILGGKKFTLEGKDYI	Cockroach	CR
KFTLEGKDYILRVSQ	Cockroach	CR
CLSGFMGIDLPKGPL	Cockroach	CR
WILGDVFIGKFYTEF	Cockroach	CR
SCITYQRGSHAGNKL	Cockroach	CR
NKLAMQEFMILPTGA	Cockroach	CR
YHHLKNVIKGKFGLD	Cockroach	CR
KDGLDLIKDAIEKAG	Cockroach	CR
LDLIKDAIEKAGYTG	Cockroach	CR
LIKDAIEKAGYTGKI	Cockroach	CR
KIEIGMDVAASEFFR	Cockroach	CR
KYDLDFKNPNTDKSK	Cockroach	CR
SKWIDKDQLTALYME	Cockroach	CR
FIKEFPVVSIEDPFD	Cockroach	CR
DDLTVTNPTRIQTAI	Cockroach	CR
LLLKVNQIGTVTESI	Cockroach	CR
GTVTESIQAHTLAKA	Cockroach	CR
VTESIQAHTLAKANG	Cockroach	CR
NGWGTMVSHRSGETE	Cockroach	CR
WGTMVSHRSGETEDS	Cockroach	CR
ETEDSFIADLVVGLS	Cockroach	CR
PCRSERLAKYNQILR	Cockroach	CR
AKYNQILRIEEELGD	Cockroach	CR
KYPDMILSCSRDKTL	Cockroach	CR
ILSCSRDKTLIVWKL	Cockroach	CR
RDKTLIVWKLTRDET	Cockroach	CR
VSDVVLSSDGNYALS	Cockroach	CR
LSSDGNYALSGSWDK	Cockroach	CR
NYALSGSWDKTLRLW	Cockroach	CR
TLRLWDLAAGRTTRR	Cockroach	CR
KDVLSVAFSVDNRQI	Cockroach	CR
VAFSVDNRQIVSGSR	Cockroach	CR
FSPNHSNPIIVSAGW	Cockroach	CR
SNPIIVSAGWDKVVK	Cockroach	CR
DKVVKVWNLTNCKLK	Cockroach	CR
VWNLTNCKLKINHIG	Cockroach	CR
NCKLKINHIGHTGYL	Cockroach	CR
GKDCKAMLWDLNDGK	Cockroach	CR
AMLWDLNDGKHLHTL	Cockroach	CR
ITALCFSPNRYWLCA	Cockroach	CR
GYFDNTIRVWQVSVF	Cockroach	CR
MGRKFWVGGNWKMNG	Cockroach	CR
YLESTKNILPSNVAA	Cockroach	CR
GAFTGEISPAMLNDI	Cockroach	CR
EISPAMLNDIGINWV	Cockroach	CR
MLNDIGINWVILGHS	Cockroach	CR
GINWVILGHSERRNV	Cockroach	CR
DLISDKVVHALESGL	Cockroach	CR
KVVHALESGLNVVAC	Cockroach	CR
GKTEEVVFQQTKAIA	Cockroach	CR
IAYEPVWAIGTGKTA	Cockroach	CR
DGFLVGGASLKPEFV	Cockroach	CR
GGASLKPEFVQIINA	Cockroach	CR
SLYNLNYIGSEDSIY	Cockroach	CR
NYIGSEDSIYPKSML	Cockroach	CR
DNTRAFNVSIETPVL	Cockroach	CR
SVNATSVRLQSWQSE	Cockroach	CR
LYYKPTCVVDSSYIN	Cockroach	CR
DLNVSQDRIGYVYAL	Cockroach	CR
QASNMYRNFTKGLCG	Cockroach	CR
IINNQIGPKPTLIPS	Cockroach	CR
IGPKPTLIPSQSPMT	Cockroach	CR
TLIPSQSPMTSDDKC	Cockroach	CR
PLICHATESYTIDVN	Cockroach	CR
GKRVVLPVEIPIQCE	Cockroach	CR
MTWNALLCCLLVSAA	Cockroach	CR
AASAITPGWLPINSQ	Cockroach	CR
VANQYTGILYKARLS	Cockroach	CR
KARLSLDRNEDQLIT	Cockroach	CR
LDRNEDQLITGKVTE	Cockroach	CR
DQLITGKVTEAQFSP	Cockroach	CR
GKVTEAQFSPVNTQF	Cockroach	CR
AQFSPVNTQFSSGWD	Cockroach	CR
VNTQFSSGWDESVPD	Cockroach	CR
SSGWDESVPDEKLHW	Cockroach	CR
ESVPDEKLHWDVVPM	Cockroach	CR
QIELNSRGEVRKLRV	Cockroach	CR
VVVDEDKKVYRVFES	Cockroach	CR
RVFESTVTGRCEALY	Cockroach	CR
TVTGRCEALYEVDHL	Cockroach	CR
CEALYEVDHLYPTTY	Cockroach	CR
EVDHLYPTTYLNPWQ	Cockroach	CR
YPTTYLNPWQWTQQH	Cockroach	CR
LNPWQWTQQHDTKLR	Cockroach	CR
WTQQHDTKLRIMKTH	Cockroach	CR
IMKTHQFTNCRHNSA	Cockroach	CR
NAFEYFHLKQHKPET	Cockroach	CR
AVSRVIADGDNLKNF	Cockroach	CR
IADGDNLKNFTFYSG	Cockroach	CR
IVLNPEIYNKQKGML	Cockroach	CR
VSHINVTVERKGREL	Cockroach	CR
VTVERKGRELTVIDY	Cockroach	CR
ELRNVGDLSYSTSLV	Cockroach	CR
RNSASMDLSSSSMSS	Cockroach	CR
MDLSSSSMSSSSSSS	Cockroach	CR
SSMSSSSSSSSSSSS	Cockroach	CR
SSSSSSSSSSSSSSS	Cockroach	CR
SSSSSSSSSSSEEHH	Cockroach	CR
SSSSSSEEHHSHNQK	Cockroach	CR
SEEHHSHNQKLSKKR	Cockroach	CR
QVPLPRPLFEANFDA	Cockroach	CR
RPLFEANFDASSGLT	Cockroach	CR
ANFDASSGLTTEQPV	Cockroach	CR
SSGLTTEQPVTFRPR	Cockroach	CR
TEQPVTFRPRRQLFQ	Cockroach	CR
TFRPRRQLFQGQDMS	Cockroach	CR
RQLFQGQDMSEEETE	Cockroach	CR
GQDMSEEETEQNPEI	Cockroach	CR
EEETEQNPEIIPANL	Cockroach	CR
LIHNTKQVDVDPVGV	Cockroach	CR
KQVDVDPVGVAVRLS	Cockroach	CR
KDIAADLQGEPRVGE	Cockroach	CR
DLQGEPRVGEDRHIL	Cockroach	CR
PRVGEDRHILPRFTI	Cockroach	CR
AARKLYKLENDHPNY	Cockroach	CR
DHPNYMNWDTWRVYR	Cockroach	CR
MNWDTWRVYRDAVSQ	Cockroach	CR
WRVYRDAVSQAGTWS	Cockroach	CR
DAVSQAGTWSALNSI	Cockroach	CR
SEMVEPKEASHLITV	Cockroach	CR
LPAAVSDKNKAYLHF	Cockroach	CR
SDKNKAYLHFLFEMT	Cockroach	CR
IPYLVQEFDDAVKEN	Cockroach	CR
EHNPRKVIDLLLSLY	Cockroach	CR
LDQNEHADIRVEALF	Cockroach	CR
AELTHTESNNQVLSA	Cockroach	CR
TESNNQVLSASQSAI	Cockroach	CR
SQSAIKSAANVEGDI	Cockroach	CR
KSAANVEGDIYSEMR	Cockroach	CR
VEGDIYSEMRRKAKA	Cockroach	CR
NNLGRINTHVQKGYM	Cockroach	CR
INTHVQKGYMVSSMT	Cockroach	CR
FVEGNLKYFNMGVQK	Cockroach	CR
KTYKKPTNFNHTKLS	Cockroach	CR
TLTLPCAMGLPAYFK	Cockroach	CR
CAMGLPAYFKMNSPS	Cockroach	CR
QTDAKTDVPMSLENF	Cockroach	CR
FSTAFDNKEYISGLD	Cockroach	CR
DNKEYISGLDRKVEV	Cockroach	CR
ISGLDRKVEVHVPVK	Cockroach	CR
IIPLFTDRDYDVLQW	Cockroach	CR
TDRDYDVLQWQTIPY	Cockroach	CR
TTIHNVPDFETVYMD	Cockroach	CR
TAHFEKKMGENTGIV	Cockroach	CR
KKMGENTGIVFKVKY	Cockroach	CR
DTDQEFLDTKWFLDE	Cockroach	CR
LFTGLNYDVPTKDIF	Cockroach	CR
NYDVPTKDIFYNNLT	Cockroach	CR
YNNLTVYYDHEDTKN	Cockroach	CR
VYYDHEDTKNHAVSF	Cockroach	CR
EDTKNHAVSFTVTKE	Cockroach	CR
HAVSFTVTKEQSKFY	Cockroach	CR
TVTKEQSKFYETLNP	Cockroach	CR
LKLSSGKKQKHRNVK	Cockroach	CR
GKKQKHRNVKSHRIR	Cockroach	CR
SHRIRREYTEDENPA	Cockroach	CR
REYTEDENPAIPKDK	Cockroach	CR
DENPAIPKDKQPNSH	Cockroach	CR
IPKDKQPNSHPRRQE	Cockroach	CR
QPNSHPRRQEYLSKS	Cockroach	CR
VLDMTLKFEGPAESY	Cockroach	CR
LKFEGPAESYFTTTV	Cockroach	CR
FYDQHYYEEKKRNQF	Cockroach	CR
YYEEKKRNQFCLSWS	Cockroach	CR
EFDPNSKVHAIMNIG	Cockroach	CR
IMNIGKECENGGSAV	Cockroach	CR
KECENGGSAVANIDM	Cockroach	CR
KNLTVSKLCDHEMRT	Cockroach	CR
SKLCDHEMRTKRDHV	Cockroach	CR
HEMRTKRDHVLPACR	Cockroach	CR
KRDHVLPACRNSTER	Cockroach	CR
LPACRNSTERASDLN	Cockroach	CR
NSTERASDLNRVHVD	Cockroach	CR
LYPHVSEDVIVDNPA	Cockroach	CR
FNVSIETPVLSVNAT	Cockroach	CR
PRTSFAKRFAKWALP	Cockroach	CR
TCVVDSSYINTFDNF	Cockroach	CR
AFKPTSPVPNMQREV	Cockroach	CR
SPVPNMQREVLVFLR	Cockroach	CR
NAKIELKPNQGMPEV	Cockroach	CR
LKPNQGMPEVYVEGK	Cockroach	CR
YVEGKRVDYNHHHST	Cockroach	CR
RVDYNHHHSTDLNVS	Cockroach	CR
HHHSTDLNVSQDRIG	Cockroach	CR
PTKAAHIVFPSYEIE	Cockroach	CR
YRNFTKGLCGNMDGE	Cockroach	CR
KGLCGNMDGEFVNDV	Cockroach	CR
NMDGEFVNDVLTPWG	Cockroach	CR
FVNDVLTPWGCYAKD	Cockroach	CR
ASYADNSNSEVRKIK	Cockroach	CR
NSNSEVRKIKATQNE	Cockroach	CR
VRKIKATQNEQTCVP	Cockroach	CR
ATQNEQTCVPQFHQP	Cockroach	CR
QTCVPQFHQPLVSHQ	Cockroach	CR
MRLSQVIKLADTSSS	Cockroach	CR
VIKLADTSSSSESSS	Cockroach	CR
DTSSSSESSSSSESH	Cockroach	CR
SESSSSSESHENNSS	Cockroach	CR
SSESHENNSSPSSES	Cockroach	CR
ENNSSPSSESQVNKS	Cockroach	CR
PSSESQVNKSKRQPN	Cockroach	CR
QVNKSKRQPNSRPRS	Cockroach	CR
KRQPNSRPRSSSSSS	Cockroach	CR
SRPRSSSSSSSSSSS	Cockroach	CR
SSSSSSSSSSESNES	Cockroach	CR
SSSSSESNESVLAKK	Cockroach	CR
ESNESVLAKKIINNQ	Cockroach	CR
VLAKKIINNQIGPKP	Cockroach	CR
QSPMTSDDKCMTQQP	Cockroach	CR
SDDKCMTQQPRHTYY	Cockroach	CR
MTQQPRHTYYENQFC	Cockroach	CR
RHTYYENQFCVSEKP	Cockroach	CR
ENQFCVSEKPLDTCM	Cockroach	CR
VSEKPLDTCMPLICH	Cockroach	CR
LDTCMPLICHATESY	Cockroach	CR
ATESYTIDVNFYCVP	Cockroach	CR
TIDVNFYCVPLGPAA	Cockroach	CR
FYCVPLGPAANHYMK	Cockroach	CR
LGPAANHYMKLVKKG	Cockroach	CR
LVKKGILPDLSRNRN	Cockroach	CR
ILPDLSRNRNGKRVV	Cockroach	CR
SRNRNGKRVVLPVEI	Cockroach	CR
VLPVEIPIQCEPVLN	Cockroach	CR
CPGNTRWNEDEETCT	House dust mites	HDM
DDKFECPSRFGYFAD	House dust mites	HDM
DDPTTTVHPTTTEQP	House dust mites	HDM
EFKNRFLMSAEAFEH	House dust mites	HDM
FKKAFNKNYATVEEE	House dust mites	HDM
LKTQFDLNAETSACR	House dust mites	HDM
NKNYATVEEEEVARK	House dust mites	HDM
QHDNGYQPNYHAVNI	House dust mites	HDM
SNWEAVHKDCPGNTR	House dust mites	HDM
TQGVDYWIVRNSWDT	House dust mites	HDM
TTEQPDDKFECPSRF	House dust mites	HDM
TVHPTTTEQPDDKFE	House dust mites	HDM
VHKDCPGNTRWNEDE	House dust mites	HDM
YPPDVKQIREALTQT	House dust mites	HDM
MNNEKNVSFEFIGST	Ragweed	RAG
NNEKNVSFEFIGSTN	Ragweed	RAG
FEFIGSTNEVDEIKV	Ragweed	RAG
EFIGSTNEVDEIKVM	Ragweed	RAG
EVDEIKVMACYAAGS	Ragweed	RAG
VDEIKVMACYAAGSI	Ragweed	RAG
EVDEIKLLPCAWAGN	Ragweed	RAG
VDEIKLLPCAWAGNV	Ragweed	RAG
CSDPGFTRYCPWQVV	Ragweed	RAG
SDPGFTRYCPWQVVC	Ragweed	RAG
YCPWQVVCYESRKIC	Ragweed	RAG
CPWQVVCYESRKICA	Ragweed	RAG
AKNAAKMRMNVTKNT	Ragweed	RAG
KNAAKMRMNVTKNTI	Ragweed	RAG
SQKCGKMRMNVTKNT	Ragweed	RAG
QKCGKMRMNVTKNTI	Ragweed	RAG
MEINKLVCFSFSLVL	Ragweed	RAG
EINKLVCFSFSLVLI	Ragweed	RAG
FSFSLVLILGLVESF	Ragweed	RAG
SFSLVLILGLVESFH	Ragweed	RAG
LGLVESFHYHERELE	Ragweed	RAG
GLVESFHYHERELES	Ragweed	RAG
YHERELESEEGFMGM	Ragweed	RAG
HERELESEEGFMGMY	Ragweed	RAG
EEGFMGMYDRWREQH	Ragweed	RAG
EGFMGMYDRWREQHN	Ragweed	RAG
DRWREQHNIEMRSPE	Ragweed	RAG
RWREQHNIEMRSPER	Ragweed	RAG
IEMRSPERFNVFKYN	Ragweed	RAG
EMRSPERFNVFKYNV	Ragweed	RAG
FNVFKYNVRRIHESN	Ragweed	RAG
NVFKYNVRRIHESNK	Ragweed	RAG
RRIHESNKMDKPYKL	Ragweed	RAG
RIHESNKMDKPYKLK	Ragweed	RAG
MDKPYKLKVNEFADM	Ragweed	RAG
DKPYKLKVNEFADMT	Ragweed	RAG
VNEFADMTNLEFVNT	Ragweed	RAG
NEFADMTNLEFVNTY	Ragweed	RAG
NLEFVNTYANSKISH	Ragweed	RAG
LEFVNTYANSKISHF	Ragweed	RAG
ANSKISHFQALRGSA	Ragweed	RAG
NSKISHFQALRGSAP	Ragweed	RAG
QALRGSAPGSIDTDP	Ragweed	RAG
ALRGSAPGSIDTDPN	Ragweed	RAG
GSIDTDPNKDFIYAN	Ragweed	RAG
SIDTDPNKDFIYANV	Ragweed	RAG
KDFIYANVTKIPDKV	Ragweed	RAG
DFIYANVTKIPDKVD	Ragweed	RAG
TKIPDKVDWREKNAV	Ragweed	RAG
KIPDKVDWREKNAVT	Ragweed	RAG
WREKNAVTDVKGQGG	Ragweed	RAG
REKNAVTDVKGQGGC	Ragweed	RAG
DVKGQGGCGSCWAFA	Ragweed	RAG
VKGQGGCGSCWAFAA	Ragweed	RAG
VVALEGINAIRTGKL	Ragweed	RAG
VALEGINAIRTGKLV	Ragweed	RAG
AIRTGKLVKFSEQQL	Ragweed	RAG
IRTGKLVKFSEQQLV	Ragweed	RAG
KFSEQQLVDCDMTNA	Ragweed	RAG
FSEQQLVDCDMTNAG	Ragweed	RAG
DCDMTNAGCDGGLME	Ragweed	RAG
CDMTNAGCDGGLMEP	Ragweed	RAG
QNVPGLDEEALRKAV	Ragweed	RAG
NVPGLDEEALRKAVA	Ragweed	RAG
HQPVATGIQLSGHGL	Ragweed	RAG
QPVATGIQLSGHGLQ	Ragweed	RAG
QLSGHGLQFYSEGVY	Ragweed	RAG
LSGHGLQFYSEGVYT	Ragweed	RAG
GDCGTEPNHGVGIVG	Ragweed	RAG
DCGTEPNHGVGIVGY	Ragweed	RAG
HGVGIVGYGENEKGI	Ragweed	RAG
GVGIVGYGENEKGIK	Ragweed	RAG
GENEKGIKFWTVKNS	Ragweed	RAG
ENEKGIKFWTVKNSW	Ragweed	RAG
FWTVKNSWGPTWGEK	Ragweed	RAG
WTVKNSWGPTWGEKG	Ragweed	RAG
GPTWGEKGYIHLQRG	Ragweed	RAG
PTWGEKGYIHLQRGA	Ragweed	RAG
DPDAPKDPKFKTTQR	Ragweed	RAG
PDAPKDPKFKTTQRL	Ragweed	RAG
KFKTTQRLQGIRTKL	Ragweed	RAG
FKTTQRLQGIRTKLL	Ragweed	RAG
KTTQRLQGIRTKLLE	Ragweed	RAG
TTQRLQGIRTKLLEL	Ragweed	RAG
IFPTDKEEVTKIFNR	Ragweed	RAG
FPTDKEEVTKIFNRF	Ragweed	RAG
DTNGDGQISEDELFA	Ragweed	RAG
TNGDGQISEDELFAI	Ragweed	RAG
SEDELFAILKSLGSD	Ragweed	RAG
EDELFAILKSLGSDT	Ragweed	RAG
LKSLGSDTSPDEVKR	Ragweed	RAG
KSLGSDTSPDEVKRV	Ragweed	RAG
MAEIDADGDGFISLD	Ragweed	RAG
AEIDADGDGFISLDE	Ragweed	RAG
DGFISLDEFILFCKG	Ragweed	RAG
GFISLDEFILFCKGI	Ragweed	RAG
FILFCKGIESEGDEI	Ragweed	RAG
ILFCKGIESEGDEIN	Ragweed	RAG
ESEGDEINDLKEAFK	Ragweed	RAG
SEGDEINDLKEAFKF	Ragweed	RAG
DLKEAFKFYDQNNNG	Ragweed	RAG
LKEAFKFYDQNNNGV	Ragweed	RAG
YDQNNNGVISANELH	Ragweed	RAG
DQNNNGVISANELHQ	Ragweed	RAG
ISANELHQILGRLGE	Ragweed	RAG
SANELHQILGRLGEN	Ragweed	RAG
ILGRLGENYSVESCA	Ragweed	RAG
LGRLGENYSVESCAD	Ragweed	RAG
YSVESCADMIKSVDS	Ragweed	RAG
SVESCADMIKSVDSD	Ragweed	RAG
MIKSVDSDGDGFVDF	Ragweed	RAG
IKSVDSDGDGFVDFE	Ragweed	RAG
GDGFVDFEEFRKMMS	Ragweed	RAG
DGFVDFEEFRKMMSR	Ragweed	RAG
EEFRKMMSRKGGDGA	Ragweed	RAG
EFRKMMSRKGGDGAM	Ragweed	RAG
AEDEDKAERDRIFGA	Ragweed	RAG
EDEDKAERDRIFGAF	Ragweed	RAG
AEEEDKAERDRIFGA	Ragweed	RAG
EEEDKAERDRIFGAF	Ragweed	RAG
RDRIFGAFDANKDGK	Ragweed	RAG
DRIFGAFDANKDGKI	Ragweed	RAG
DANKDGKISSTELGE	Ragweed	RAG
ANKDGKISSTELGES	Ragweed	RAG
DANKDGKISSNELGE	Ragweed	RAG
ANKDGKISSNELGEA	Ragweed	RAG
SSNELGEALKNLGSV	Ragweed	RAG
SNELGEALKNLGSVS	Ragweed	RAG
SSTELGESLKNLGSV	Ragweed	RAG
STELGESLKNLGSVS	Ragweed	RAG
LKNLGSVSPEEVQTM	Ragweed	RAG
KNLGSVSPEEVQTMM	Ragweed	RAG
PEEVQTMMEELDTDG	Ragweed	RAG
EEVQTMMEELDTDGD	Ragweed	RAG
EELDTDGDGFISYEE	Ragweed	RAG
ELDTDGDGFISYEEF	Ragweed	RAG
SWQTYVDEHLMCDIE	Ragweed	RAG
WQTYVDEHLMCDIEG	Ragweed	RAG
SWQTYVDEHLMCDID	Ragweed	RAG
WQTYVDEHLMCDIDG	Ragweed	RAG
HLMCDIDGSGHHLSS	Ragweed	RAG
LMCDIDGSGHHLSSA	Ragweed	RAG
HLMCDIEGTGQHLAS	Ragweed	RAG
LMCDIEGTGQHLASA	Ragweed	RAG
SGHHLSSAAIFGTDG	Ragweed	RAG
GHHLSSAAIFGTDGA	Ragweed	RAG
TGQHLASAAIFGTDG	Ragweed	RAG
GQHLASAAIFGTDGN	Ragweed	RAG
NAIIKEFSEPGALAP	Ragweed	RAG
AIIKEFSEPGALAPT	Ragweed	RAG
AAGTLAPTGLFLAGA	Ragweed	RAG
AGTLAPTGLFLAGAK	Ragweed	RAG
YMVIQGEPGAVIRGK	Ragweed	RAG
MVIQGEPGAVIRGKK	Ragweed	RAG
GAVIRGKKGAGGICI	Ragweed	RAG
AVIRGKKGAGGICIK	Ragweed	RAG
GAGGICIKKTGQAMV	Ragweed	RAG
AGGICIKKTGQAMVF	Ragweed	RAG
KTGQAMVFGIYEEPV	Ragweed	RAG
TGQAMVFGIYEEPVA	Ragweed	RAG
KTGQAMVFGIYEEPV	Ragweed	RAG
TGQAMVFGIYEEPVN	Ragweed	RAG
GIYEEPVNPGQCNMV	Ragweed	RAG
IYEEPVNPGQCNMVV	Ragweed	RAG
GIYEEPVAPGQCNMV	Ragweed	RAG
IYEEPVAPGQCNMVV	Ragweed	RAG
PGQCNMVVERLGDYL	Ragweed	RAG
GQCNMVVERLGDYLV	Ragweed	RAG
NMVVERLGDYLVDQG	Ragweed	RAG
MVVERLGDYLVDQGM	Ragweed	RAG
MDCIRILWSVAVGLL	Ragweed	RAG
DCIRILWSVAVGLLL	Ragweed	RAG
SVAVGLLLVSWRPTM	Ragweed	RAG
VAVGLLLVSWRPTMF	Ragweed	RAG
VSWRPTMFAASPTCD	Ragweed	RAG
SWRPTMFAASPTCDT	Ragweed	RAG
AASPTCDTVQNILAP	Ragweed	RAG
ASPTCDTVQNILAPC	Ragweed	RAG
VQNILAPCAGFLTGQ	Ragweed	RAG
QNILAPCAGFLTGQE	Ragweed	RAG
AGFLTGQEPSKACCT	Ragweed	RAG
GFLTGQEPSKACCTG	Ragweed	RAG
PSKACCTGVNNLNNS	Ragweed	RAG
SKACCTGVNNLNNSR	Ragweed	RAG
VNNLNNSRKTKADRV	Ragweed	RAG
NNLNNSRKTKADRVA	Ragweed	RAG
KTKADRVAVCNCIKE	Ragweed	RAG
TKADRVAVCNCIKEL	Ragweed	RAG
VCNCIKELTKSIAYD	Ragweed	RAG
CNCIKELTKSIAYDP	Ragweed	RAG
TKSIAYDPKRMPLLS	Ragweed	RAG
KSIAYDPKRMPLLST	Ragweed	RAG
KRMPLLSTKCGVKPD	Ragweed	RAG
RMPLLSTKCGVKPDF	Ragweed	RAG
KCGVKPDFPAVDKNL	Ragweed	RAG
CGVKPDFPAVDKNLD	Ragweed	RAG
DFPAVDKNLDCSKLP	Ragweed	RAG
FPAVDKNLDCSKLPV	Ragweed	RAG
LVPCAWAGNVCGEKR	Ragweed	RAG
VPCAWAGNVCGEKRA	Ragweed	RAG
NVCGEKRAYCCSDPG	Ragweed	RAG
VCGEKRAYCCSDPGR	Ragweed	RAG
YCCSDPGRYCPWQVV	Ragweed	RAG
CCSDPGRYCPWQVVC	Ragweed	RAG
YCPWQVVCYESSEIC	Ragweed	RAG
CPWQVVCYESSEICS	Ragweed	RAG
VVCYESSEICSKKCG	Ragweed	RAG
VCYESSEICSKKCGK	Ragweed	RAG
MAAGLLVFVLAISEI	Ragweed	RAG
AAGLLVFVLAISEIA	Ragweed	RAG
VLAISEIASVKGKLC	Ragweed	RAG
LAISEIASVKGKLCE	Ragweed	RAG
SVKGKLCEKPSVTWS	Ragweed	RAG
VKGKLCEKPSVTWSG	Ragweed	RAG
KPSVTWSGKCKVKQT	Ragweed	RAG
PSVTWSGKCKVKQTD	Ragweed	RAG
KCKVKQTDKCDKRCI	Ragweed	RAG
CKVKQTDKCDKRCIE	Ragweed	RAG
KCDKRCIEWEGAKHG	Ragweed	RAG
CDKRCIEWEGAKHGA	Ragweed	RAG
WEGAKHGACHKRDSK	Ragweed	RAG
EGAKHGACHKRDSKA	Ragweed	RAG
CHKRDSKATCFCYFD	Ragweed	RAG
HKRDSKATCFCYFDC	Ragweed	RAG
TCFCYFDCDPTKNPG	Ragweed	RAG
CFCYFDCDPTKNPGP	Ragweed	RAG
DPTKNPGPPPGAPKG	Ragweed	RAG
PTKNPGPPPGAPKGK	Ragweed	RAG
PPGAPKGKAPAPSPP	Ragweed	RAG
PGAPKGKAPAPSPPS	Ragweed	RAG
APAPSPPSGGGAPPP	Ragweed	RAG
PAPSPPSGGGAPPPS	Ragweed	RAG
GGGAPPPSGGEGGDG	Ragweed	RAG
GGAPPPSGGEGGDGP	Ragweed	RAG
GGEGGDGPPPPEGGE	Ragweed	RAG
GEGGDGPPPPEGGEG	Ragweed	RAG
PPPEGGEGGGDGGGE	Ragweed	RAG
PPEGGEGGGDGGGEG	Ragweed	RAG
GGDGGGEGGGEGGGD	Ragweed	RAG
GDGGGEGGGEGGGDG	Ragweed	RAG
GGEGGGDGGGEGGGE	Ragweed	RAG
GEGGGDGGGEGGGEG	Ragweed	RAG
GGEGGGEGGGDGGGD	Ragweed	RAG
GEGGGEGGGDGGGDG	Ragweed	RAG
GGDGGGDGGGEGGGE	Ragweed	RAG
GDGGGDGGGEGGGEG	Ragweed	RAG
GGDGGGEGGGEGGGE	Ragweed	RAG
GDGGGEGGGEGGGER	Ragweed	RAG
GKVYLVGGPELGGWK	Ragweed	RAG
KVYLVGGPELGGWKL	Ragweed	RAG
PELGGWKLQSDPRAY	Ragweed	RAG
ELGGWKLQSDPRAYA	Ragweed	RAG
QSDPRAYALWSARQQ	Ragweed	RAG
SDPRAYALWSARQQF	Ragweed	RAG
LWSARQQFKTTDVLW	Ragweed	RAG
WSARQQFKTTDVLWF	Ragweed	RAG
KTTDVLWFNFTTGED	Ragweed	RAG
TTDVLWFNFTTGEDS	Ragweed	RAG
NFTTGEDSVAEVWRE	Ragweed	RAG
FTTGEDSVAEVWREE	Ragweed	RAG
VAEVWREEAYHACDI	Ragweed	RAG
AEVWREEAYHACDIK	Ragweed	RAG
AYHACDIKDPIRLEP	Ragweed	RAG
YHACDIKDPIRLEPG	Ragweed	RAG
DPIRLEPGGPDRFTL	Ragweed	RAG
PIRLEPGGPDRFTLL	Ragweed	RAG
GPDRFTLLTPGSHFI	Ragweed	RAG
PDRFTLLTPGSHFIC	Ragweed	RAG
TPGSHFICTKDQKFV	Ragweed	RAG
PGSHFICTKDQKFVA	Ragweed	RAG
FICTKDQKFVACVPG	Ragweed	RAG
ICTKDQKFVACVPGR	Ragweed	RAG
MGIKHCCYILYFTLA	Ragweed	RAG
GIKHCCYILYFTLAL	Ragweed	RAG
MGIKQCCYILYFTLA	Ragweed	RAG
GIKQCCYILYFTLAL	Ragweed	RAG
ILYFTLALVALLQPV	Ragweed	RAG
LYFTLALVALLQPVR	Ragweed	RAG
ILYFTLALVTLLQPV	Ragweed	RAG
LYFTLALVTLLQPVR	Ragweed	RAG
VALLQPVRSAEGVGE	Ragweed	RAG
ALLQPVRSAEGVGEI	Ragweed	RAG
VTLLQPVRSAEDLQE	Ragweed	RAG
TLLQPVRSAEDLQEI	Ragweed	RAG
SAEGVGEILPSVNET	Ragweed	RAG
AEGVGEILPSVNETR	Ragweed	RAG
SAEDLQEILPVNETR	Ragweed	RAG
AEDLQEILPVNETRR	Ragweed	RAG
LPSVNETRSLQACEA	Ragweed	RAG
PSVNETRSLQACEAL	Ragweed	RAG
RSLQACEALNIIDKC	Ragweed	RAG
SLQACEALNIIDKCW	Ragweed	RAG
RRLTTSGAYNIIDGC	Ragweed	RAG
RLTTSGAYNIIDGCW	Ragweed	RAG
LNIIDKCWRGKADWE	Ragweed	RAG
NIIDKCWRGKADWEN	Ragweed	RAG
RGKADWENNRQALAD	Ragweed	RAG
GKADWENNRQALADC	Ragweed	RAG
RGKADWAENRKALAD	Ragweed	RAG
GKADWAENRKALADC	Ragweed	RAG
NRQALADCAQGFAKG	Ragweed	RAG
RQALADCAQGFAKGT	Ragweed	RAG
AQGFAKGTYGGKWGD	Ragweed	RAG
QGFAKGTYGGKWGDV	Ragweed	RAG
YGGKWGDVYTVTSNL	Ragweed	RAG
GGKWGDVYTVTSNLD	Ragweed	RAG
YTVTSNLDDDVANPK	Ragweed	RAG
TVTSNLDDDVANPKE	Ragweed	RAG
YTVTSELDDDVANPK	Ragweed	RAG
TVTSELDDDVANPKE	Ragweed	RAG
DDVANPKEGTLRFAA	Ragweed	RAG
DVANPKEGTLRFAAA	Ragweed	RAG
DDVANPKEGTLRFGA	Ragweed	RAG
DVANPKEGTLRFGAA	Ragweed	RAG
FKNDMVINLNQELVV	Ragweed	RAG
KNDMVINLNQELVVN	Ragweed	RAG
LNQELVVNSDKTIDG	Ragweed	RAG
NQELVVNSDKTIDGR	Ragweed	RAG
LDKEMVVNSDKTIDG	Ragweed	RAG
DKEMVVNSDKTIDGR	Ragweed	RAG
GAKVEIINAGFTLNG	Ragweed	RAG
AKVEIINAGFTLNGV	Ragweed	RAG
NIHDVKVLPGGMIKS	Ragweed	RAG
IHDVKVLPGGMIKSN	Ragweed	RAG
DGPPILRQASDGDTI	Ragweed	RAG
GPPILRQASDGDTIN	Ragweed	RAG
ASDGDTINVAGSSQI	Ragweed	RAG
SDGDTINVAGSSQIW	Ragweed	RAG
SFDGLVDVTLGSTHV	Ragweed	RAG
FDGLVDVTLGSTHVT	Ragweed	RAG
TLGSTHVTISNCKFT	Ragweed	RAG
LGSTHVTISNCKFTQ	Ragweed	RAG
ISNCKFTQQSKAILL	Ragweed	RAG
SNCKFTQQSKAILLG	Ragweed	RAG
QSKAILLGADDTHVQ	Ragweed	RAG
SKAILLGADDTHVQD	Ragweed	RAG
KGMLATVAFNMFTDN	Ragweed	RAG
GMLATVAFNMFTDNV	Ragweed	RAG
DQRMPRCRFGFFQVV	Ragweed	RAG
QRMPRCRFGFFQVVN	Ragweed	RAG
RFLAPDDQIKKNVLA	Ragweed	RAG
FLAPDDQIKKNVLAR	Ragweed	RAG
TGTGAAESMAWNWRS	Ragweed	RAG
GTGAAESMAWNWRSD	Ragweed	RAG
AIFVTSGSDPVLTPV	Ragweed	RAG
IFVTSGSDPVLTPVQ	Ragweed	RAG
DPVLTPVQSAGMIPA	Ragweed	RAG
PVLTPVQSAGMIPAE	Ragweed	RAG
SAGMIPAEPGEAAIK	Ragweed	RAG
AGMIPAEPGEAAIKL	Ragweed	RAG
PGEAAIKLTSSAGVF	Ragweed	RAG
GEAAIKLTSSAGVFS	Ragweed	RAG
LTSSAGVLSCRPGAP	Ragweed	RAG
TSSAGVLSCRPGAPC	Ragweed	RAG
LTMNAGVLTCSPGAP	Ragweed	RAG
TMNAGVLTCSPGAPC	Ragweed	RAG
LTSSAGVLSCHQGAP	Ragweed	RAG
TSSAGVLSCHQGAPC	Ragweed	RAG
LTSSAGVFSCHPGAP	Ragweed	RAG
TSSAGVFSCHPGAPC	Ragweed	RAG
LTSSAGVLSCQPGAP	Ragweed	RAG
TSSAGVLSCQPGAPC	Ragweed	RAG
LTSSAGVLSCQPGTP	Ragweed	RAG
TSSAGVLSCQPGTPC	Ragweed	RAG
LTSSAGVFSCRPGAP	Ragweed	RAG
TSSAGVFSCRPGAPC	Ragweed	RAG
AIPKVPPGPNITATY	Timothy grass	TG
MASSSSVLLVVALFA	Timothy grass	TG
MASSSSVLLVVVLFA	Timothy grass	TG
PGPNITATYGGKWLD	Timothy grass	TG
SVLLVVALFAVFLGS	Timothy grass	TG
SVLLVVVLFAVFLGS	Timothy grass	TG
TATYGGKWLDAKSTW	Timothy grass	TG
VALFAVFLGSAHGIP	Timothy grass	TG
VVLFAVFLGSAYGIP	Timothy grass	TG
GKWLDAKSTWYGKPT	Timothy grass	TG
VFLGSAHGIPKVPPG	Timothy grass	TG
VFLGSAYGIPKVPPG	Timothy grass	TG
AHGIPKVPPGPNITA	Timothy grass	TG
AYGIPKVPPGPNITA	Timothy grass	TG
KVPPGPNITATYGDK	Timothy grass	TG
PNITATYGDKWLDAK	Timothy grass	TG
TYGDKWLDAKSTWYG	Timothy grass	TG
WLDAKSTWYGKPTAA	Timothy grass	TG
WLDAKSTWYGKPTGA	Timothy grass	TG
STWYGKPTAAGPKDN	Timothy grass	TG
KPTGAGPKDNGGACG	Timothy grass	TG
GPKDNGGACGYKDVD	Timothy grass	TG
GGACGYKDVDKPPFS	Timothy grass	TG
GMTGCGNTPIFKSGR	Timothy grass	TG
GNTPIFKSGRGCGSC	Timothy grass	TG
FKSGRGCGSCFEIKC	Timothy grass	TG
GCGSCFEIKCTKPEA	Timothy grass	TG
CSGEPVVVHITDDNE	Timothy grass	TG
GAMAKKGDEQKLRSA	Timothy grass	TG
KGDEQKLRSAGELEL	Timothy grass	TG
KGDEQKLRSAGEVEI	Timothy grass	TG
KLRSAGEVEIQFRRV	Timothy grass	TG
QFRRVKCKYPEGTKV	Timothy grass	TG
EGTKVTFHVEKGSNP	Timothy grass	TG
KGSNPNYLALLVKFV	Timothy grass	TG
LVKFVAGDGDVVAVD	Timothy grass	TG
LVKYVNGDGDVVAVD	Timothy grass	TG
IKEKGKDKWIALKES	Timothy grass	TG
IKEKGKDKWIELKES	Timothy grass	TG
KDKWIALKESWGAIW	Timothy grass	TG
KDKWIELKESWGAIW	Timothy grass	TG
RIDTPEVLKGPFTVR	Timothy grass	TG
DKLTGPFTVRYTTEG	Timothy grass	TG
EVLKGPFTVRYTTEG	Timothy grass	TG
VIPEGWKADTCYESK	Timothy grass	TG
PFTVRYTTEGGTKGE	Timothy grass	TG
PFTVRYTTEGGTKTE	Timothy grass	TG
YTTEGGTKGEAKDVI	Timothy grass	TG
YTTEGGTKTEAEDVI	Timothy grass	TG
GTKGEAKDVIPEGWK	Timothy grass	TG
AEDVIPEGWKADTSY	Timothy grass	TG
AKDVIPEGWKADTAY	Timothy grass	TG
MSMASSSSSSLLAMA	Timothy grass	TG
SSSSSLLAMAVLAAL	Timothy grass	TG
LLAMAVLAALFAGAW	Timothy grass	TG
VLAALFAGAWCVPKV	Timothy grass	TG
FAGAWCVPKVTFTVE	Timothy grass	TG
CVPKVTFTVEKGSNE	Timothy grass	TG
TFTVEKGSNEKHLAV	Timothy grass	TG
KGSNEKHLAVLVKYE	Timothy grass	TG
KHLAVLVKYEGDTMA	Timothy grass	TG
LVKYEGDTMAEVELR	Timothy grass	TG
GDTMAEVELREHGSD	Timothy grass	TG
EVELREHGSDEWVAM	Timothy grass	TG
TKGEGGVWTFDSEEP	Timothy grass	TG
DSEEPLQGPFNFRFL	Timothy grass	TG
DVVPEKYTIGATYAP	Timothy grass	TG
VPEKYTIGATYAPEE	Timothy grass	TG
IKYTRPGDSLAEVEL	Timothy grass	TG
PGDSLAEVELRQHGS	Timothy grass	TG
AEVELRQHGSEEWEP	Timothy grass	TG
RQHGSEEWEPLTKKG	Timothy grass	TG
KSSKPLVGPFNFRFM	Timothy grass	TG
RNVFDEVIPTAFKIG	Timothy grass	TG
RNVFDEVIPTAFSIG	Timothy grass	TG
EVIPTAFKIGKTYTP	Timothy grass	TG
EVIPTAFSIGKTYKP	Timothy grass	TG
IPTAFKIGKTYTPEE	Timothy grass	TG
IPTAFSIGKTYKPEE	Timothy grass	TG
MANSRAFALVLLFCA	Timothy grass	TG
SSCEVALSYYPTPLA	Timothy grass	TG
AFALVLLFCALASSC	Timothy grass	TG
ALSYYPTPLAKEDFL	Timothy grass	TG
LLFCALASSCQVAFS	Timothy grass	TG
PTPLAKEDFLRCLVK	Timothy grass	TG
KEDFLRCLVKEIPPR	Timothy grass	TG
LASSCQVAFSYFPPP	Timothy grass	TG
QVAFSYFPPPAAKED	Timothy grass	TG
RCLVKEIPPRLLYAK	Timothy grass	TG
YFPPPAAKEDFLGCL	Timothy grass	TG
AAKEDFLGCLVKEIP	Timothy grass	TG
FLGCLVKEIPPRLLY	Timothy grass	TG
VKEIPPRLLYAKSSP	Timothy grass	TG
PRLLYAKSSPAYPSV	Timothy grass	TG
AKSSPAYPSVLGQTI	Timothy grass	TG
SRWSSPDNVKPIYIV	Timothy grass	TG
AYPSVLGQTIRNSRW	Timothy grass	TG
PDNVKPIYIVTPTNA	Timothy grass	TG
LGQTIRNSRWSSPDN	Timothy grass	TG
PIYIVTPTNASHIQS	Timothy grass	TG
RNSRWSSPDNVKPLY	Timothy grass	TG
TPTNASHIQSAVVCG	Timothy grass	TG
SHIQSAVVCGRRHGV	Timothy grass	TG
SSPDNVKPLYIITPT	Timothy grass	TG
AVVCGRRHGVRIRVR	Timothy grass	TG
VKPLYIITPTNVSHI	Timothy grass	TG
IITPTNVSHIQSAVV	Timothy grass	TG
RRHGVRIRVRSGGHD	Timothy grass	TG
NVSHIQSAVVCGRRH	Timothy grass	TG
QSAVVCGRRHSVRIR	Timothy grass	TG
CGRRHSVRIRVRSGG	Timothy grass	TG
YEGLSYRSLQPEEFA	Timothy grass	TG
SVRIRVRSGGHDYEG	Timothy grass	TG
YRSLQPEEFAVVDLS	Timothy grass	TG
PEEFAVVDLSKMRAV	Timothy grass	TG
VRSGGHDYEGLSYRS	Timothy grass	TG
HDYEGLSYRSLQPET	Timothy grass	TG
VVDLSKMRAVWVDGK	Timothy grass	TG
LSYRSLQPETFAVVD	Timothy grass	TG
LQPETFAVVDLNKMR	Timothy grass	TG
FAVVDLNKMRAVWVD	Timothy grass	TG
ELYYAIHKASTVLAF	Timothy grass	TG
LNKMRAVWVDGKART	Timothy grass	TG
VDSGAQLGELYYAIH	Timothy grass	TG
AVWVDGKARTAWVDS	Timothy grass	TG
IHKASTVLAFPAGVC	Timothy grass	TG
QLGELYYAIHKASPV	Timothy grass	TG
GKARTAWVDSGAQLG	Timothy grass	TG
TVLAFPAGVCPTIGV	Timothy grass	TG
YYAIHKASPVLAFPA	Timothy grass	TG
AWVDSGAQLGELYYA	Timothy grass	TG
KASPVLAFPAGVCPT	Timothy grass	TG
GAQLGELYYAIYKAS	Timothy grass	TG
ELYYAIYKASPTLAF	Timothy grass	TG
IYKASPTLAFPAGVC	Timothy grass	TG
PTLAFPAGVCPTIGV	Timothy grass	TG
PAGVCPTIGVGGNFA	Timothy grass	TG
PTIGVGGNFAGGGFG	Timothy grass	TG
GGGFGMLLRKYGIAA	Timothy grass	TG
VIDVKLVDANGTLHD	Timothy grass	TG
LVDANGTLHDKKSMG	Timothy grass	TG
GTLHDKKSMGDDHFW	Timothy grass	TG
YGIAAENVIDVKLVD	Timothy grass	TG
ENVIDVKLVDANGKL	Timothy grass	TG
VKLVDANGKLHDKKS	Timothy grass	TG
ANGKLHDKKSMGDDH	Timothy grass	TG
GGESFGIVVAWKVRL	Timothy grass	TG
HDKKSMGDDHFWAVR	Timothy grass	TG
MGDDHFWAVRGGGGE	Timothy grass	TG
FWAVRGGGGESFGIV	Timothy grass	TG
WKVRLLPVPPTVTVF	Timothy grass	TG
GGGGESFGIVVAWQV	Timothy grass	TG
LPVPPTVTVFKIPKK	Timothy grass	TG
SFGIVVAWQVKLLPV	Timothy grass	TG
TVTVFKIPKKASEGA	Timothy grass	TG
KIPKKASEGAVDIIN	Timothy grass	TG
VAWQVKLLPVPPTVT	Timothy grass	TG
ASEGAVDIINRWQVV	Timothy grass	TG
KLLPVPPTVTIFKIS	Timothy grass	TG
PPTVTIFKISKTVSE	Timothy grass	TG
VDIINRWQVVAPQLP	Timothy grass	TG
IFKISKTVSEGAVDI	Timothy grass	TG
RWQVVAPQLPDDLMI	Timothy grass	TG
APQLPDDLMIRVIAQ	Timothy grass	TG
KTVSEGAVDIINKWQ	Timothy grass	TG
DDLMIRVIAQGPTAT	Timothy grass	TG
GAVDIINKWQVVAPQ	Timothy grass	TG
INKWQVVAPQLPADL	Timothy grass	TG
RVIAQGPTATFEAMY	Timothy grass	TG
GPTATFEAMYLGTCQ	Timothy grass	TG
VVAPQLPADLMIRII	Timothy grass	TG
FEAMYLGTCQTLTPM	Timothy grass	TG
LPADLMIRIIAQGPK	Timothy grass	TG
LGTCQTLTPMMSSKF	Timothy grass	TG
MIRIIAQGPKATFEA	Timothy grass	TG
AQGPKATFEAMYLGT	Timothy grass	TG
TLTPMMSSKFPELGM	Timothy grass	TG
ATFEAMYLGTCKTLT	Timothy grass	TG
MSSKFPELGMNASHC	Timothy grass	TG
MYLGTCKTLTPLMSS	Timothy grass	TG
PELGMNASHCNEMSW	Timothy grass	TG
CKTLTPLMSSKFPEL	Timothy grass	TG
NASHCNEMSWIQSIP	Timothy grass	TG
PLMSSKFPELGMNPS	Timothy grass	TG
IQSIPFVHLGHRDNI	Timothy grass	TG
KFPELGMNPSHCNEM	Timothy grass	TG
GMNPSHCNEMSWIQS	Timothy grass	TG
HCNEMSWIQSIPFVH	Timothy grass	TG
HRDNIEDDLLNRNNT	Timothy grass	TG
EDDLLNRNNTFKPFA	Timothy grass	TG
SWIQSIPFVHLGHRD	Timothy grass	TG
IPFVHLGHRDALEDD	Timothy grass	TG
LGHRDALEDDLLNRN	Timothy grass	TG
SDYVYEPFPKRVWEQ	Timothy grass	TG
ALEDDLLNRNNSFKP	Timothy grass	TG
EPFPKRVWEQIFSTW	Timothy grass	TG
EYKSDYVYEPFPKEV	Timothy grass	TG
LLNRNNSFKPFAEYK	Timothy grass	TG
RVWEQIFSTWLLKPG	Timothy grass	TG
YVYEPFPKEVWEQIF	Timothy grass	TG
WEQIFSTWLLKPGAG	Timothy grass	TG
SDYVYQPFPKTVWEQ	Timothy grass	TG
STWLLKPGAGIMIFD	Timothy grass	TG
QPFPKTVWEQILNTW	Timothy grass	TG
TVWEQILNTWLVKPG	Timothy grass	TG
ILNTWLVKPGAGIMI	Timothy grass	TG
PYGATISATPEWATP	Timothy grass	TG
ISATPEWATPFPHRK	Timothy grass	TG
LVKPGAGIMIFDPYG	Timothy grass	TG
AGIMIFDPYGATISA	Timothy grass	TG
EWATPFPHRKGVLFN	Timothy grass	TG
FDPYGATISATPESA	Timothy grass	TG
ATISATPESATPFPH	Timothy grass	TG
IQYVNYWFAPGAGAA	Timothy grass	TG
TPESATPFPHRKGVL	Timothy grass	TG
TPFPHRKGVLFNIQY	Timothy grass	TG
YWFAPGAGAAPLSWS	Timothy grass	TG
GAGAAPLSWSKEIYN	Timothy grass	TG
RKGVLFNIQYVNYWF	Timothy grass	TG
FNIQYVNYWFAPGAA	Timothy grass	TG
PLSWSKEIYNYMEPY	Timothy grass	TG
KEIYNYMEPYVSKNP	Timothy grass	TG
VNYWFAPGAAAAPLS	Timothy grass	TG
APGAAAAPLSWSKDI	Timothy grass	TG
AAPLSWSKDIYNYME	Timothy grass	TG
WSKDIYNYMEPYVSK	Timothy grass	TG
YNYMEPYVSKNPRQA	Timothy grass	TG
DLGRNEVVNDVSTFS	Timothy grass	TG
PYVSKNPRQAYANYR	Timothy grass	TG
EVVNDVSTFSSGLVW	Timothy grass	TG
NPRQAYANYRDIDLG	Timothy grass	TG
VSTFSSGLVWGQKYF	Timothy grass	TG
YANYRDIDLGRNEVV	Timothy grass	TG
DIDLGRNEVVNDVST	Timothy grass	TG
SGLVWGQKYFKGNFQ	Timothy grass	TG
GQKYFKGNFQRLAIT	Timothy grass	TG
RNEVVNDVSTYASGK	Timothy grass	TG
KGNFQRLAITKGKVD	Timothy grass	TG
NDVSTYASGKVWGQK	Timothy grass	TG
YASGKVWGQKYFKGN	Timothy grass	TG
VWGQKYFKGNFERLA	Timothy grass	TG
YFKGNFERLAITKGK	Timothy grass	TG
YFRNEQSIPPLIQKY	Timothy grass	TG
FERLAITKGKVDPTD	Timothy grass	TG
ITKGKVDPTDYFRNE	Timothy grass	TG
VDPTDYFRNEQSIPP	Timothy grass	TG
YFRNEQSIPPLIKKY	Timothy grass	TG
DLGYAPATPAAPGAG	Timothy grass	TG
MAVHQYTVALFLAVA	Timothy grass	TG
PISVTAPPPQLPRPP	Timothy grass	TG
SVKRSNGSAEVHRGA	Timothy grass	TG
APPPQLPRPPATPPP	Timothy grass	TG
NGSAEVHRGAVPRRG	Timothy grass	TG
PATPAAPGAGYTPAT	Timothy grass	TG
YTVALFLAVALVAGP	Timothy grass	TG
AAPGAGYTPATPAAP	Timothy grass	TG
FLAVALVAGPAGSYA	Timothy grass	TG
LPRPPATPPPPPPPQ	Timothy grass	TG
VHRGAVPRRGPRGGP	Timothy grass	TG
ATPPPPPPPQLGASP	Timothy grass	TG
LVAGPAGSYAADLGY	Timothy grass	TG
VPRRGPRGGPGRSYA	Timothy grass	TG
AGSYAADLGYGPATP	Timothy grass	TG
PPPPQLGASPYKLGP	Timothy grass	TG
PRGGPGRSYAADAGY	Timothy grass	TG
ADLGYGPATPAAPAA	Timothy grass	TG
GRSYAADAGYAPATP	Timothy grass	TG
LGASPYKLGPSPKAR	Timothy grass	TG
ADAGYAPATPAAAGA	Timothy grass	TG
GPATPAAPAAGYTPA	Timothy grass	TG
YKLGPSPKARSERPA	Timothy grass	TG
APATPAAAGAEAGKA	Timothy grass	TG
AAPAAGYTPATPAAP	Timothy grass	TG
SPKARSERPAIVPPA	Timothy grass	TG
AAAGAEAGKATTEEQ	Timothy grass	TG
GYTPATPAAPAGAEP	Timothy grass	TG
SERPAIVPPADKYRT	Timothy grass	TG
EAGKATTEEQKLIED	Timothy grass	TG
IVPPADKYRTFVATF	Timothy grass	TG
TPAAPAGAEPAGKAT	Timothy grass	TG
AGAEPAGKATTEEQK	Timothy grass	TG
TTEEQKLIEDINVGF	Timothy grass	TG
AGKATTEEQKLIEKI	Timothy grass	TG
TEEQKLIEKINAGFK	Timothy grass	TG
KAFAEGLSGEPKGGA	Timothy grass	TG
AAASVPAADKFKTFE	Timothy grass	TG
GLSGEPKGGAESSSK	Timothy grass	TG
AAGVPPADKYRTFVA	Timothy grass	TG
FKTFEAAFTSSSKAA	Timothy grass	TG
AAFTSSSKAATAKAP	Timothy grass	TG
PADKYRTFVATFGAA	Timothy grass	TG
RTFVATFGAASNKAF	Timothy grass	TG
SSKAATAKAPGLVPK	Timothy grass	TG
TAKAPGLVPKLDAAY	Timothy grass	TG
TFGAASNKAFAEGLS	Timothy grass	TG
GLVPKLDAAYSVAYK	Timothy grass	TG
SNKAFAEGLSGEPKG	Timothy grass	TG
AEGLSGEPKGAAESS	Timothy grass	TG
LDAAYSVAYKAAVGA	Timothy grass	TG
GEPKGAAESSSKAAL	Timothy grass	TG
SVAYKAAVGATPEAK	Timothy grass	TG
AAESSSKAALTSKLD	Timothy grass	TG
AAVGATPEAKFDSFV	Timothy grass	TG
VATLSEALRIIAGTL	Timothy grass	TG
AAYKLAYKTAEGATP	Timothy grass	TG
AYKTAEGATPEAKYD	Timothy grass	TG
EGATPEAKYDAYVAT	Timothy grass	TG
EAKYDAYVATVSEAL	Timothy grass	TG
VHAVKPVTEEPGMAK	Timothy grass	TG
AYVATVSEALRIIAG	Timothy grass	TG
PVTEEPGMAKIPAGE	Timothy grass	TG
PGMAKIPAGELQIID	Timothy grass	TG
IPAGELQIIDKIDAA	Timothy grass	TG
TLEVHAVKPAAEEVK	Timothy grass	TG
AVKPAAEEVKVIPAG	Timothy grass	TG
AEEVKVIPAGELQVI	Timothy grass	TG
TAAATAPADDKFTVF	Timothy grass	TG
AIKAGTGGAYESYKF	Timothy grass	TG
EAAFNKAIKESTGGA	Timothy grass	TG
STGGAYDTYKCIPSL	Timothy grass	TG
CIPSLEAAVKQAYAA	Timothy grass	TG
FEAAFNDAIKASTGG	Timothy grass	TG
LEAAVKQAYAATVAT	Timothy grass	TG
KPAAAATATATSAVG	Timothy grass	TG
KQAYAATVATAPEVK	Timothy grass	TG
ATATATSAVGAPTGA	Timothy grass	TG
EVQKVSQPATGAATV	Timothy grass	TG
TSAVGAPTGATTAAA	Timothy grass	TG
APTGATTAAAGGYKV	Timothy grass	TG
SQPATGAATVAAGAA	Timothy grass	TG
YTVFETALKKAITAM	Timothy grass	TG
GAATVAAGAATTAAG	Timothy grass	TG
TALKKAITAMSEAQK	Timothy grass	TG
AAGAATTAAGAASGA	Timothy grass	TG
AITAMSEAQKAAKPA	Timothy grass	TG
SEAQKAAKPAAAATA	Timothy grass	TG
TTAAGAASGAATVAA	Timothy grass	TG
AAKPAAAATATATAA	Timothy grass	TG
AASGAATVAAGGYKV	Timothy grass	TG
AAATATATAAVGAAT	Timothy grass	TG
TATAAVGAATGAATA	Timothy grass	TG
VGAATGAATAATGGY	Timothy grass	TG
MAAHKFMVAMFLAVA	Timothy grass	TG
MGKATTEEQKLIEDV	Timothy grass	TG
FLAVAVVLGLATSPT	Timothy grass	TG
VVLGLATSPTAEGGK	Timothy grass	TG
ATSPTAEGGKATTEE	Timothy grass	TG
TANVPPADKYKTLEA	Timothy grass	TG
AEGGKATTEEQKLIE	Timothy grass	TG
PADKYKTLEAAFTVS	Timothy grass	TG
ATTEEQKLIEDINAS	Timothy grass	TG
ATTEEQKLIEDVNAS	Timothy grass	TG
KTLEAAFTVSSKRNL	Timothy grass	TG
QKLIEDINASFRAAM	Timothy grass	TG
QKLIEDVNASFRAAM	Timothy grass	TG
DINASFRAAMATTAN	Timothy grass	TG
DVNASFRAAMATTAN	Timothy grass	TG
FRAAMATTANVPPAD	Timothy grass	TG
ATTANVPPADKYKTF	Timothy grass	TG
VPPADKYKTFEAAFT	Timothy grass	TG
KYKTFEAAFTVSSKR	Timothy grass	TG
EAAFTVSSKRNLADA	Timothy grass	TG
VSSKRNLADAVSKAP	Timothy grass	TG
NLADAVSKAPQLVPK	Timothy grass	TG
VSKAPQLVPKLDEVY	Timothy grass	TG
QLVPKLDEVYNAAYN	Timothy grass	TG
LDEVYNAAYNAADHA	Timothy grass	TG
NAAYNAADHAAPEDK	Timothy grass	TG
AADHAAPEDKYEAFV	Timothy grass	TG
APEDKYEAFVLHFSE	Timothy grass	TG
YEAFVLHFSEALHII	Timothy grass	TG
YEAFVLHFSEALRII	Timothy grass	TG
LHFSEALHIIAGTPE	Timothy grass	TG
LHFSEALRIIAGTPE	Timothy grass	TG
ALHIIAGTPEVHAVK	Timothy grass	TG
ALRIIAGTPEVHAVK	Timothy grass	TG
IIAGTPEVHAVKPGA	Timothy grass	TG
MADDMERIFKRFDTN	Timothy grass	TG
ERIFKRFDTNGDGKI	Timothy grass	TG
RFDTNGDGKISLSEL	Timothy grass	TG
GDGKISLSELTDALR	Timothy grass	TG
SLSELTDALRTLGST	Timothy grass	TG
TDALRTLGSTSADEV	Timothy grass	TG
TLGSTSADEVQRMMA	Timothy grass	TG
SADEVQRMMAEIDTD	Timothy grass	TG
QRMMAEIDTDGDGFI	Timothy grass	TG
EIDTDGDGFIDFNEF	Timothy grass	TG
GDGFIDFNEFISFCN	Timothy grass	TG
DFNEFISFCNANPGL	Timothy grass	TG
ISFCNANPGLMKDVA	Timothy grass	TG
CNANPGLMKDVAKVF	Timothy grass	TG
MSWQTYVDEHLMCEI	Timothy grass	TG
DKGPGFVVTGRVYCD	Timothy grass	TG
YVDEHLMCEIEGHHL	Timothy grass	TG
FVVTGRVYCDPCRAG	Timothy grass	TG
LMCEIEGHHLASAAI	Timothy grass	TG
RVYCDPCRAGFETNV	Timothy grass	TG
EGHHLASAAIFGHDG	Timothy grass	TG
EGHHLASAAILGHDG	Timothy grass	TG
PCRAGFETNVSHNVQ	Timothy grass	TG
ASAAIFGHDGTVWAQ	Timothy grass	TG
ASAAILGHDGTVWAQ	Timothy grass	TG
FETNVSHNVQGATVA	Timothy grass	TG
FGHDGTVWAQSADFP	Timothy grass	TG
SHNVQGATVAVDCRP	Timothy grass	TG
TVWAQSADFPQFKPE	Timothy grass	TG
GATVAVDCRPFNGGE	Timothy grass	TG
SADFPQFKPEEITGI	Timothy grass	TG
VDCRPFNGGESKLKA	Timothy grass	TG
QFKPEEITGIMKDFD	Timothy grass	TG
QFKPEEITGIMKDLD	Timothy grass	TG
FNGGESKLKAEATTD	Timothy grass	TG
EITGIMKDFDEPGHL	Timothy grass	TG
EITGIMKDLDEPGHL	Timothy grass	TG
SKLKAEATTDGLGWY	Timothy grass	TG
MKDFDEPGHLAPTGM	Timothy grass	TG
MKDLDEPGHLAPTGM	Timothy grass	TG
EATTDGLGWYKIEID	Timothy grass	TG
EPGHLAPTGMFVAAA	Timothy grass	TG
EPGHLAPTGMFVAGA	Timothy grass	TG
GLGWYKIEIDQDHQE	Timothy grass	TG
APTGMFVAAAKYMVI	Timothy grass	TG
APTGMFVAGAKYMVI	Timothy grass	TG
KIEIDQDHQEEICEV	Timothy grass	TG
FVAAAKYMVIQGEPG	Timothy grass	TG
FVAGAKYMVIQGEPG	Timothy grass	TG
QDHQEEICEVVLAKS	Timothy grass	TG
KYMVIQGEPGAVIRG	Timothy grass	TG
KYMVIQGEPGRVIRG	Timothy grass	TG
EICEVVLAKSPDTTC	Timothy grass	TG
QGEPGAVIRGKKGAG	Timothy grass	TG
QGEPGRVIRGKKGAG	Timothy grass	TG
VLAKSPDTTCSEIEE	Timothy grass	TG
AVIRGKKGAGGITIK	Timothy grass	TG
RVIRGKKGAGGITIK	Timothy grass	TG
PDTTCSEIEEFRDRA	Timothy grass	TG
KKGAGGITIKKTGQA	Timothy grass	TG
SEIEEFRDRARVPLT	Timothy grass	TG
GITIKKTGQALVVGI	Timothy grass	TG
FRDRARVPLTSNNGI	Timothy grass	TG
KTGQALVVGIYDEPM	Timothy grass	TG
RVPLTSNNGIKQQGI	Timothy grass	TG
LVVGIYDEPMTPGQC	Timothy grass	TG
SNNGIKQQGIRYANP	Timothy grass	TG
YDEPMTPGQCNMVVE	Timothy grass	TG
KQQGIRYANPIAFFR	Timothy grass	TG
TPGQCNMVVERLGDY	Timothy grass	TG
NMVVERLGDYLVEQG	Timothy grass	TG
IAFFRKEPLKECGGI	Timothy grass	TG
MVVERLGDYLVEQGM	Timothy grass	TG
KEPLKECGGILQAYD	Timothy grass	TG
ECGGILQAYDLRDAP	Timothy grass	TG
GILQAYDLRDAPETP	Timothy grass	TG
GKKEEKKEEKKESGD	Timothy grass	TG
KKEEKKESGDAASGA	Timothy grass	TG
KESGDAASGADGTYD	Timothy grass	TG
AASGADGTYDITKLG	Timothy grass	TG
DGTYDITKLGAKPDG	Timothy grass	TG
ITKLGAKPDGKTDCT	Timothy grass	TG
AKPDGKTDCTKEVEE	Timothy grass	TG
KEVEEAWASACGGTG	Timothy grass	TG
AWASACGGTGKNTIV	Timothy grass	TG
CGGTGKNTIVIPKGD	Timothy grass	TG
KNTIVIPKGDFLTGP	Timothy grass	TG
IPKGDFLTGPLNFTG	Timothy grass	TG
FLTGPLNFTGPCKGD	Timothy grass	TG
LNFTGPCKGDSVTIK	Timothy grass	TG
PCKGDSVTIKLDGNL	Timothy grass	TG
SVTIKLDGNLLSSND	Timothy grass	TG
LDGNLLSSNDLAKYK	Timothy grass	TG
IMRIKKLTITGKGTL	Timothy grass	TG
KLTITGKGTLDGQGK	Timothy grass	TG
GKGTLDGQGKAVWGK	Timothy grass	TG
DGQGKAVWGKNSCAK	Timothy grass	TG
NSCAKNYNCKILPNT	Timothy grass	TG
NYNCKILPNTLVLDF	Timothy grass	TG
ILPNTLVLDFCDDAL	Timothy grass	TG
LVLDFCDDALIEGIT	Timothy grass	TG
CDDALIEGITLLNAK	Timothy grass	TG
IEGITLLNAKFFHMN	Timothy grass	TG
LLNAKFFHMNIYECK	Timothy grass	TG
FFHMNIYECKGVTVK	Timothy grass	TG
IYECKGVTVKDVTIT	Timothy grass	TG
GVTVKDVTITAPGDS	Timothy grass	TG
DVTITAPGDSPNTDG	Timothy grass	TG
APGDSPNTDGIHIGD	Timothy grass	TG
PNTDGIHIGDSSKVT	Timothy grass	TG
IHIGDSSKVTITDTT	Timothy grass	TG
SSKVTITDTTIGTGD	Timothy grass	TG
ITDTTIGTGDDCISI	Timothy grass	TG
IGTGDDCISIGPGST	Timothy grass	TG
DCISIGPGSTGLNIT	Timothy grass	TG
GPGSTGLNITGVTCG	Timothy grass	TG
GLNITGVTCGPGHGI	Timothy grass	TG
GVTCGPGHGISVGSL	Timothy grass	TG
PGHGISVGSLGRYKD	Timothy grass	TG
SVGSLGRYKDEKDVT	Timothy grass	TG
GRYKDEKDVTDITVK	Timothy grass	TG
EKDVTDITVKNCVLK	Timothy grass	TG
DITVKNCVLKKSTNG	Timothy grass	TG
NCVLKKSTNGLRIKS	Timothy grass	TG
KSTNGLRIKSYEDAK	Timothy grass	TG
LRIKSYEDAKSPLTA	Timothy grass	TG
YEDAKSPLTASKLTY	Timothy grass	TG
SPLTASKLTYENVKM	Timothy grass	TG
SKLTYENVKMEDVGY	Timothy grass	TG
ENVKMEDVGYPIIID	Timothy grass	TG
EDVGYPIIIDQKYCP	Timothy grass	TG
PIIIDQKYCPNKICT	Timothy grass	TG
QKYCPNKICTSKGDS	Timothy grass	TG
NKICTSKGDSARVTV	Timothy grass	TG
[truncated: 378 more rows]
